# **The fitness burden imposed by synthesising quorum sensing signals.**

**Ruparell A.,<sup>1#</sup> Dubern JF.,<sup>1</sup> Ortori CA.,<sup>2</sup> Harrison, F.<sup>1</sup>, Halliday NM.,<sup>1</sup>  
Emtage A.,<sup>2β</sup> Ashawesh, M.,<sup>1</sup> Laughton CA.,<sup>2</sup> Diggle, SP.<sup>1</sup>, Williams  
P.,<sup>1</sup> Barrett DA.,<sup>2</sup> and Hardie KR.<sup>1\*</sup>**

School of Life Sciences, Centre for Biomolecular Sciences, University of Nottingham,  
University Park, Nottingham, NG7 2RD, United Kingdom<sup>1</sup>

Centre for Analytical Bioscience, School of Pharmacy, University of Nottingham,  
Nottingham NG7 2RD, United Kingdom<sup>2</sup>

Current Address: Mars Waltham Centre for Pet Nutrition, United Kingdom<sup>#</sup>

Current Address: University of Nottingham, Malaysia<sup>β</sup>

## **\*Corresponding author:**

**Dr Kim Rachael Hardie**, School of Life Sciences, Centre for Biomolecular  
Sciences, University of Nottingham, University Park, Nottingham, NG7 2RD, Tel:  
0115 8467958, Fax: 0115 8467951, Email: [kim.hardie@nottingham.ac.uk](mailto:kim.hardie@nottingham.ac.uk)

## **Running title:**

Fitness burden of AHL synthesis

## **Originality-Significance Statement:**

Bacterial cells within populations communicate with each other to control social behaviors by producing diffusible quorum sensing (QS) signal molecules. Evolutionary theory predicts that both the cost of signal production and the response to signals should incur fitness costs for producing cells. Here we provide the first empirical evidence that the production of QS signals incurs fitness costs to producing cells. Since QS plays a major role in bacterial pathogenicity, this finding will underpin novel antimicrobial strategies that are urgently needed to replace currently available antimicrobials that are becoming obsolete through the ever-rising incidence of resistance.

## **Summary**

It is now well established that bacterial populations utilize cell-to-cell signaling (quorum-sensing, QS) to control the production of public goods and other co-operative behaviours. Evolutionary theory predicts that both the cost of signal production and the response to signals should incur fitness costs for producing cells. Although costs imposed by the downstream consequences of QS have been shown, it has not been demonstrated that the production of QS signal molecules (QSSMs) results in a decrease in fitness. We measured the fitness cost to cells of synthesising QSSMs by quantifying metabolite levels in the presence of QSSM synthases. We found that: (i) bacteria making QSSMs have a growth defect that exerts an evolutionary cost, (ii) production of QSSMs correlates with reduced intracellular concentrations of QSSM precursors, (iii) the production of heterologous QSSMs negatively impacts the production of a native QSSM that shares common substrates, and (iv)

supplementation with exogenously added metabolites partially rescued growth defects imposed by QSSM synthesis. These data provide the first direct experimental evidence that the production of QS signals carries fitness costs to producer cells.

## Keywords:

*Pseudomonas aeruginosa*, quorum sensing, *N*-acyl homoserine lactones, metabolite profiling, activated methyl cycle, fitness, evolution

## Introduction

Communication systems are widespread in plants, animals and microorganisms. For true communication (signaling) to evolve, signals must transfer information that benefits both the signaller and the receiver. Whether signals are visible, acoustic or chemical in nature, their production implies a cost to the emitter, but these costs are often difficult to measure experimentally (Smith & Harper, 2003; Keller & Surette, 2006; Diggle *et al.*, 2007b; Popat *et al.*, 2015). Many bacterial species communicate using small diffusible signals to co-ordinate social behaviours in a process termed quorum sensing (QS) (Atkinson & Williams, 2009; Darch *et al.*, 2012). QS signaling molecules (QSSMs) are synthesized inside the bacterial cell and released into the surrounding environment. Once accumulated to a threshold concentration, the QSSMs drive the expression of genes encoding public goods and other social behaviors that benefit the surrounding population of cells. Previous work has shown that there are fitness costs associated with producing QS regulated public goods,

and that these costs are significant enough for non-producing cheats to evolve and spread in populations (mutants that can respond to QSSMs, but do not make them) (Diggle *et al.*, 2007a; Rumbaugh *et al.*, 2009; Pollitt *et al.*, 2014). Evolutionary theory has also predicted that the production of the QSSMs themselves should also incur a fitness cost, but there have not been any studies explicitly measuring the fitness consequences of producing them. Any fitness costs are presumed to be a drain in metabolites, and Keller and Surette estimated that production of each of three well-studied QSSM classes (oligopeptides, *N*-acylhomoserine lactones (AHLs) and Autoinducer-2 (AI-2) impose a metabolic cost of 184 ATPs, 8 ATPs and 0-1 ATP respectively (Keller & Surette, 2006). We therefore set out to experimentally determine whether there are metabolic consequences for QSSM synthesis.

We chose to work with the two dedicated QSSM LuxI-type synthases (LasI and RhII) that produce AHLs in the opportunistic, multi-antibiotic-resistant pathogen *Pseudomonas aeruginosa*. LasI, synthesizes long chain AHLs (predominantly *N*-(3-oxododecanoyl)-L-homoserine lactone (OC<sub>12</sub>-HSL)). RhII primarily synthesizes the short chain AHL (*N*-butanoyl-L-homoserine lactone (C<sub>4</sub>-HSL)). *P. aeruginosa* incorporates these AHL synthases into a complex hierarchical QS network which controls virulence factor production and thus pathogenicity in plants and animals (including humans) (Williams & Cámara, 2009). LasI and RhII were each introduced into a heterologous host, *Escherichia coli* that does not naturally produce AHLs. We reasoned that it is important to determine whether there are fitness costs specifically associated with QSSM production *per se*. A future challenge remains with respect to understanding the fitness burden of a complete QS system in its natural, adapted host. In this context, the added cost of responding to the QSSM which may in turn be integrated into

a complex regulatory network or have pleiotropic effects unlinked to the response to signals can also be considered.

Synthesis of AHLs depends on the availability of the precursors: an appropriately charged acyl carrier protein (acyl-ACP) and S-adenosyl-L-methionine (SAM) (More *et al.*, 1996; Jiang *et al.*, 1998; Parsek *et al.*, 1999; Raychaudhuri *et al.*, 2005). The donation of the acyl group from acyl-ACP to the amine of SAM results in the formation of the AHL and release of 5'-methylthioadenosine (MTA) (More *et al.*, 1996; Jiang *et al.*, 1998; Parsek *et al.*, 1999). Both LasI and RhII use SAM, but link it to a different fatty acid. We can assume they are approximately catalytically equivalent, although kinetic data is only available for RhII (Jiang *et al.*, 1998; Raychaudhuri *et al.*, 2005). As the major methyl donor in eubacterial, archaeobacterial and eukaryotic cells, SAM is a critically important metabolite (Cooper *et al.*, 1993; Low *et al.*, 2001). The availability of SAM and relative flux through the AMC (activated methyl cycle: to which SAM contributes see supplementary Figure 1) significantly impacts upon central metabolism and influences cell fitness, as has been well documented in the context of two AMC enzymes, LuxS and Pfs (Winzer *et al.*, 2003; Vendeville *et al.*, 2005; Hardie & Heurlier, 2008; Heurlier *et al.*, 2009; Doherty *et al.*, 2010; Halliday *et al.*, 2010).

Here we test the metabolic (by measuring AMC-linked metabolite levels) and fitness (by monitoring growth) costs of making an AHL QSSM in the heterologous host, *E. coli*. We show that (i) signal production causes a growth defect that imposes a fitness disadvantage in mixed populations, (ii) signal production correlates with reduced intracellular concentrations of the substrates required, (iii) heterologous

signal production negatively impacts native signal production, (iv) supplementation with exogenously added metabolites partially rescued growth defects imposed by signal synthesis. Our findings demonstrate that the fitness cost of generating the QS signals required for co-ordinated social behaviour in bacteria can be substantial.

## Experimental Procedures

**Bacterial strains and growth conditions.** Strains and plasmids used in this study (supplementary Table 1) were routinely grown in Luria-Bertani medium (LB) or on nutrient agar plates at 37°C. A MOPS minimal medium (MMM) was prepared as described previously (Vendeville *et al.*, 2005). Antibiotics were added at the following concentrations: carbenicillin 25 µg/ml; tetracycline 25 µg/ml and 100 µg/ml kanamycin. Isopropylthio-β-D-galactoside (IPTG) was added at a final concentration of 1 mM, unless otherwise indicated. Growth was followed by estimating optical densities at 600 nm using a 1 in 10 dilution of cultures into the growth medium to ensure accurate spectrophotometer readings, or using viable cell counts (colony forming units: CFU).

**DNA manipulation and cloning procedures.** DNA was purified using a plasmid purification kit (Qiagen) or Wizard genomic DNA purification kit (Promega). Restriction enzyme digestion, ligation and agarose gel electrophoresis were performed using standard methods (Sambrook *et al.*, 1989). Restriction fragments were routinely purified from agarose gels using a QIAquick kit (Qiagen). Transformation of *E. coli* was carried out by electroporation (Farinha & Kropinski, 1990). Oligonucleotide primers (supplementary Table 1) were synthesised by Sigma Genosys. Both strands of cloned PCR products were sequenced by the DNA

Sequencing Laboratory at the University of Nottingham (United Kingdom). Nucleotide and deduced amino acid sequences were aligned using Clustal W (<http://clustalw.genome.jp/>).

**Plasmid construction and site directed mutagenesis.** The 606-bp *lasI* and *rhII* genes were PCR-amplified using chromosomal DNA of *P. aeruginosa* PA01 as the template and the primer pairs *lasI* Forward/*lasI* Reverse or *rhII* Forward/*rhII* Reverse respectively. The purified 0.624 kb fragments were ligated into the pGEM-T Easy vector (designated pGEMT-*lasI* or pGEMT-*rhII*) and released with *EcoRI*-*StuI* digestion for cloning into shuttle vector pME6032 (pME-*lasI* and pME-*rhII*).

To mutate the *lasI* and *rhII* genes, degenerated phosphorylated PCR primer pairs amplified pGEMT-*lasI* or pGEMT-*rhII*. Following recircularisation and transformation into DH5 $\alpha$ , the *lasI* and *rhII* mutant fragments were recovered from pGEMT-Easy and inserted as *EcoRI*-*StuI* fragments into the pME6032 vector. The point mutations were confirmed by sequencing.

**SDS-PAGE and western blotting.** This was undertaken as described previously (Cooksley *et al.*, 2003). Anti-RhII was diluted to 1:2000 and anti-mouse IgG HRP (Sigma) to 1:1000.

### **Small molecule analysis.**

AHLs were quantified by LC-MS/MS as described previously (Ortori *et al.*, 2011). For extraction of intracellular AMC metabolites, bacteria were grown in 125 ml IPTG supplemented LB in 500 ml Erlenmeyer flasks at 37°C for 12 h. Samples of 5 ml

containing equivalent cell densities for each strain were quenched with 15 ml of phosphate-buffered saline (PBS), cells were lysed, metabolites derivatized and detected (Halliday *et al.*, 2010). To determine intracellular MTA levels, the existing protocol (Halliday *et al.*, 2010) was modified to use 100% MeOH for extraction and samples were reconstituted in 100  $\mu$ l of dH<sub>2</sub>O and analysed by liquid chromatography-tandem mass spectrometry using a Quattro Ultima (Waters Micromass, Manchester, UK) in conjunction with an Agilent 1100 LC system (Agilent Technologies, Waldbron, Germany) with a cooled autosampler [30]. HPLC was carried out using a Synergi 4u Hydro-RP (4  $\mu$ m, 150  $\times$  2.0 mm, Phenomenex, Macclesfield, UK) with a guard column fitted. AI-2 was quantified by (Heurlier *et al.*, 2009) and expressed as the change in bioluminescence of the reporter strains (bioluminescence in the presence of extract/background bioluminescence in the presence of sterile medium).

### **Mixed Population Competition Assay:**

Approximately 10<sup>5</sup> cells from overnight cultures of each strain or a 1:1 mixture of two strains were inoculated into 2ml MMM + tetracycline. Four wells of each population were supplemented with IPTG and four left uninduced. Cultures were grown shaking for 24 h at 37°C. An aliquot of each population was diluted and plated onto two LB + tetracycline agar plates for colony counting. To calculate the final proportion of each strain in the mixed populations, 50 colonies from each mixed population were randomly selected and streaked across an aliquot of the *E. coli* biosensor pSB1075 (Winson *et al.*, 1998) on LB + tetracycline + IPTG agar plates. The biosensor carries a *lux* reporter that is expressed in the presence of OC<sub>12</sub>-HSL, thus cross-streaking with *E. coli* MG1655(pME-*lasI*) produces luminescent streaks after overnight growth.



A Hamamatsu Aequoria darkbox and M4314 Image Intensifier Controller were used along with the software Wasabi 1.5 to image plates and score numbers of light and dark streaks. To calculate the false negative and false positive rates, ten colonies from each pure population were also streaked across the biosensor and imaged after overnight growth. Bayes' theorem was applied to these data to calculate the probability that a light streak was *E. coli* MG1655(pME-*lasI*) and that a dark streak was *E. coli* MG1655(pME6032); these were 0.99 and 0.94 respectively and we adjusted observed light/dark numbers in the mixed populations to take account of this.

The evolutionary fitness of *E. coli* MG1655(pME-*lasI*) relative to *E. coli* MG1655(pME6032) in mixed populations was calculated using:

$$v = \frac{x_2(1 - x_1)}{x_1(1 - x_2)}$$

where  $x_1$  and  $x_2$  are the initial and final frequencies of *E. coli* MG1655(pME-*lasI*) in the population, respectively (Winson *et al.*, 1998). When the two genotypes have equal fitness,  $x_1 = x_2$  and  $v = 1$ . Values of  $v < 1$  reflect being outcompeted by MG1655(pME6032) and values  $> 1$  indicate that MG1655(pME-*lasI*) outcompetes MG1655(pME6032). The relative fitness of *E. coli* MG1655(pME-*lasI*) in pure culture was calculated by randomly pairing pure MG1655(pME-*lasI*) and MG1655(pME6032) populations with IPTG treatment and applying the same formula. Data were analysed using ANOVA in R 2.14.0 (R Development, 2011). Total population size and relative fitness were both square root transformed to meet the assumptions of parametric tests and when dropping of an outlier in the growth data

caused loss of orthogonality the *car* package (Fox & Weisberg, 2011) was used to implement ANOVA with Type II sums of squares.

## Results

### **Production of chemical signals used for social communication compromises cell fitness**

Bacterial populations can communicate using QSSMs, and it has been shown that QS responses impose a fitness cost (Pai *et al.*, 2012). To test whether QSSM synthesis is also metabolically costly, the genes encoding QSSM synthases *LasI* and *RhlI* were expressed from the shuttle vector pME6032 in *E. coli*. Having hypothesized that QSSM synthesis would compromise cell fitness, the growth profiles of the strains were compared in both minimal (MMM; Figure 1) and rich (LB; supplementary Figure 4e and Figure 5e) media. The empty plasmid pME6032 had no detrimental effect on growth (referred to as non-producer). In LB medium containing abundant nutrients, there was a slightly slower initial growth rate and lower final density upon induction of the AHL synthase *LasI* demonstrating a fitness cost and by extension a potential metabolic cost (supplementary Figure 4e). In line with observations that disruption of one of the metabolic cycles feeding into AHL synthesis (the AMC) is more readily reflected in growth defects in defined media limited for the sulphur sources that feed into this pathway (Winzer *et al.*, 2003; Doherty *et al.*, 2006; Heurlier *et al.*, 2009; Holmes *et al.*, 2009; Doherty *et al.*, 2010), more drastic effects on growth were observed in MMM. The *RhlI*-producer MG1655(pME-*rhlI*) did not grow as well as the empty vector control initially (Figure 1), but over time achieved the same final population density. In accordance with the

higher level of LasI production (supplementary Figure 2a,b), it had an even more dramatic effect on growth, with the LasI-producer MG1655(pME-*lasI*) growing much slower than the non-producer, and failing to achieve a population size ( $OD_{600}$ ) equivalent to the other strains within 22 h in MMM (Figure 1).

The production of the major cognate QSSMs in *E. coli* culture supernatants by LasI and RhII (OC<sub>12</sub>-HSL and C<sub>4</sub>-HSL respectively) was confirmed by thin-layer chromatography (TLC) (data not shown) with quantification using sensitive LC-MS/MS (supplementary Figure 2c,d). In line with an absence of inhibition of *E. coli* growth inflicted by exogenous addition of these concentrations of QSSMs (supplementary Figure 6; up to 800  $\mu$ M), no defect in growth was observed in rich medium with the RhII-producing strain (supplementary Figure 5e), and the growth of the LasI-producer was only marginally reduced in rich media (supplementary Figure 4e). The masking of the overall cost of producing signals by growth in rich media suggests that it could at least in part derive from an energetic cost as it can be topped up by provision of exogenous metabolites. To determine the lower limit for the level of QSSM production that results in a cell fitness cost, IPTG concentrations were titrated down to reduce the amount of RhII or LasI produced. At the point where QSSMs were barely detectable, all strains grew at a similar rate to reach a comparable stationary phase population density.

### **Mutations that prevent signal production rescue bacterial growth defects.**

It is possible that the observed growth defects may be due to the burden of protein overproduction in producers, rather than signal synthesis. To discount this, several mutants were constructed. Whilst some LasI/RhII mutants maintained the ability to

synthesize AHLs, others did not, and only those able to make AHLs reduced the growth of *E. coli* (supplementary Figure 4 and 5).

The structures of the AHL synthases LasI and Esal were used to model the predicted structure of RhII (supplementary Figure 3a) in order to identify key residues predicted to be involved in catalysis as targets for parallel site directed mutagenesis of LasI and RhII. The catalytic residues chosen for mutagenesis were based on those identified in a previous study (Parsek *et al.*, 1997) that screened the activity of a collection of mutations in RhII. Residues F27 and W33 of LasI are important for SAM binding, and S103 appears to participate within a cluster of other residues to maintain tertiary structure interactions and may also perform a catalytic function (Hoang & Schweizer, 1999). Changes were also made to residues that may alter a specific property of the active site (see supplementary Table 2), and to R23 of LasI since we predicted it would be involved in catalysis. All the residues selected mapped to the vicinity of a pocket hypothesised to be the active site (supplementary Figure 3b).

The AHL synthase mutants that could be overproduced as a protein of the predicted size were selected for further study (supplementary Figure 4c, 5c). Wild type levels of QSSMs were produced by the LasI mutants F27Y and S103A (supplementary Figure 4a). Similarly, mutation of S103 to either A or V in RhII did not significantly lower total AHL production (supplementary Figure 5a). With the exception of LasI F27L, the other producer mutants completely lost the ability to synthesise AHLs. All the mutants able to synthesise AHLs, except LasI S103A, did so in relative proportions that resembled the profile of the wild type AHL synthase. Significant

concentrations of C<sub>4</sub>-HSL, which were not observed with wild type LasI, accounted for 20% of the AHLs made by LasI S103A (supplementary Figure 4d and 5d).

Importantly, only producer mutants that retained the ability to synthesize AHLs inhibited growth, indicating that the enzymatic activity of the QSSM synthases resulted in a fitness burden (supplementary Figure 4e,f, 5e/f). In addition, exogenous QSSMs up to 800  $\mu$ M did not affect growth of the host. *E. coli* (supplementary Figure 6a,b).

### **Increased levels of signal correlate with reduced intracellular concentrations of substrates used to make them**

As producers synthesize AHLs from specific metabolic substrates, we hypothesized that the growth defect observed may arise as a consequence of introducing metabolite-consuming enzymes. One of the metabolites central to the AMC pathway, SAM, is a substrate for AHL synthesis. We therefore determined the profiles of the AMC metabolites (SAM, SAH, SRH, HCY and MET) to test our hypothesis. In late exponential phase cells, the level of each AMC metabolite measured was reduced following signal production (Figure 2a). Metabolite concentrations were more dramatically reduced in LasI-producers than in RhII-producers. The metabolite which exhibited the greatest percentage concentration change (97% in LasI-producers, 45% in RhII-producers) was SAM (Figure 2a, supplementary Table 4). Enzyme activity was key to these metabolic perturbations because no fall in metabolite levels was observed in a mutated producer lacking the ability to synthesize AHLs (supplementary Figure 4b, 5b).

## **The production of foreign signals negatively impacts the production of a native signal.**

One of the reactions of the *E. coli* AMC is catalysed by LuxS, and leads to the generation of AI-2. AI-2 acts as a QSSM, e.g. to stimulate the production of bioluminescence by *Vibrio harveyi*. In *E. coli*, inactivation of *luxS* has a pleiotropic effect. It is not clear what signalling role LuxS plays due to variations in strains and mutagenic strategies, although it can influence the virulence of pathogenic *E. coli* (Haigh *et al.*, 2013; Palaniyandi *et al.*, 2013). To determine the influence of a foreign QSSM synthase upon the production of a native QSSM, the amount of AI-2 produced in culture supernatants was measured. The synthase genes caused a reduction in the levels of AI-2 detected, with AI-2 levels falling by 12% in RhII-producers and by a massive 54-fold in LasI-producers (Figure 2b).

## **The fitness cost of QSSM synthesis is partly due to the production of toxic side products.**

AHL-synthase catalyzed production of AHLs generates a second product, MTA, which could potentially have metabolic consequences since MTA is a potent feedback inhibitor of polyamine biosynthesis (Dante *et al.*, 1983). To determine if MTA accumulates as a result of AHL synthesis, intracellular accumulation of MTA was monitored (Figure 2c). These measurements were conducted in a defined *E. coli*  $\Delta pfs$  mutant in parallel with MG1655 because in addition to catalysing the detoxification of SAH to SRH in the reaction preceding LuxS in the AMC, Pfs can act as an MTA nucleosidase (Cornell & Riscoe, 1998), and thus potentially degrade MTA faster than we can measure it. Although MTA may not accumulate to detectable levels in MG1655, if the  $\Delta pfs$  mutant were to show higher levels there would be the potential for transient MTA accumulation that could impact upon cell fitness. As predicted, MTA levels in *E. coli* MG1655 were highly variable (data not shown), whilst in the absence of Pfs, accurate and reproducible levels of MTA were determined (Figure 2c).

Furthermore, higher basal levels of MTA were detected in the *E. coli*  $\Delta pfs$  mutant compared with *E. coli* MG1655. In both genetic backgrounds, there was a clear trend indicating that in the presence of an AHL synthase, MTA accumulated. Induction of *lasI* in the *E. coli*  $\Delta pfs$  mutant resulted in a 26-fold increase in MTA whilst induction of *rhII* caused a 14-fold increase in MTA compared to the equivalent empty vector control.

### **Supplementation with exogenously added metabolites partially rescued growth defects imposed by QSSM synthases**

As LasI and RhII production impedes the growth of *E. coli* and drains away AMC metabolites, the possibility that the exogenous addition of a metabolite that feeds into the AMC could restore growth was investigated. Despite an approximate 14-h delay, exogenous methionine promoted the growth of LasI-producers in a concentration dependent manner (Figure 3), indicating that the fitness cost of QSSM synthases can be partially rescued by replenishing the substrates for these enzymes, and thus the cost is likely to be at least partly energetic. Automated sampling facilitated the measurement of growth throughout the entire growth curve. This necessitated growth in small volumes in a microtitre plate which generated overall kinetics that differed from cultures grown in shaking flasks at larger volumes such as depicted in supplementary Figure 4. Parallel exogenous methionine supplementation in flasks also partially rescued growth defects (data not shown).

### **QSSM imposed growth defect confers a fitness cost in mixed populations.**

Having demonstrated the fitness cost of producing communication signals, we tested whether this was likely to generate a selective advantage in the absence of a beneficial

public goods production response, that could cause an evolutionary pressure in conditions more closely mimicking the natural environment where different bacterial strains co-exist in mixed populations. This is particularly important since QSSMs are themselves diffusible public goods available to non-producers. To do this, a QSSM producer and non-producer were grown singly and together, and their relative fitness assessed by ANOVA (Figure 4).

The total population density was affected by genotype (non-producer, LasI-producer or mix;  $F_{2,18} = 29.6$ ,  $p < 0.001$ ) and presence/absence of IPTG to induce the AHL synthase ( $F_{1,18} = 13.4$ ,  $p = 0.002$ ). Moreover, the effect of IPTG depended on population (interaction  $F_{2,18} = 18.2$ ,  $p < 0.001$ ). As shown in Figure 4a, in the absence of IPTG there were no significant differences in the total densities reached by the non-producer, LasI-producer or mixed populations (Tukey HSD tests,  $p > 0.47$ ), but in the presence of IPTG the LasI-producer growth was around one log lower than either non-producer or the mix ( $p < 0.001$ ). Thus adding IPTG decreased growth of LasI-producer, but did not affect the other two populations. Dropping the single outlier from the data set did not affect these results.

The relative fitness of LasI-producer depended on whether the two strains were grown in pure culture or in a mixture (ANOVA:  $F_{1,12} = 12.9$ ,  $p = 0.004$ ), on the presence of IPTG ( $F_{1,12} = 78.6$ ,  $p < 0.001$ ) and on the interaction between culture condition and IPTG ( $F_{1,12} = 6.96$ ,  $p = 0.022$ ). In the absence of IPTG, the two strains grew equally well in pure culture (Figure 4a) and post-hoc *t*-tests showed relative fitness not significantly different from 1:  $p = 0.062$ ) although the LasI-producer had a fitness advantage in mixed culture (Figure 4b)  $p < 0.001$ ). In the presence of IPTG, the relative fitness of LasI-producer was  $<1$  regardless of culture condition ( $p < 0.001$ ).



## Discussion

A number of studies have utilized bacterial QS linked phenotypes to test social evolution theory because QS controls the production of costly ‘public goods’ and as such this creates a drain on the fitness of the cells (Diggle *et al.*, 2007a; Rumbaugh *et al.*, 2009; Kohler *et al.*, 2010; Wilder *et al.*, 2011; Popat *et al.*, 2012; Darch *et al.*, 2012; West *et al.*, 2012; Gupta & Schuster, 2013). Although theory suggests that signals themselves can be costly, there has been no experimental study testing this. Here we provide the first direct evidence that production of the QSSMs themselves, upon which QS relies, is a costly metabolic burden to cells. Specifically we found that (i) bacteria making QSSMs have a growth defect that exerts an evolutionary cost, (ii) production of QSSMs correlates with reduced intracellular concentrations of QSSM precursors, (iii) the production of heterologous QSSMs negatively impacts the production of a native QSSM that shares common substrates, and (iv) supplementation with exogenously added metabolites partially rescued growth defects imposed by QSSM synthesis..

Our findings provide experimental support for the theory of Keller and Surette (Keller & Surette, 2006), who calculated the metabolic cost of QSSM synthesis in terms of ATP. We investigated the cost of signal production at three levels (metabolism, growth, and fitness to compete in co-culture), and showed that the levels of specific central pathway metabolites are altered, and that this has an impact on growth and thus fitness to survive in mixed populations. In the context of horizontal transfer of QS systems, this metabolic perturbation was demonstrated to affect the levels of a native QSSM from the recipient cell suggesting the potential for knock-on effects on the social environment.

A critical question arises regarding the biological relevance of the experimental set up of the study since it uses medium copy (approximately 15) plasmids with an inducible *ptrc* promoter rather than a single chromosomal copy of the QSSM synthase encoding genes under the control of their native promoters. The experiments were conducted in this manner to provide us with control over signal production, enabling full induction of the signal at a specified point with the primary aim of determining if signal production can incur a fitness cost. It is possible that even a cost equivalent to a small percentage of what we measured could have a significant impact in natural populations and provide a selective pressure for bacterial evolution. The genes studied here are not naturally plasmid borne, but QS has been extensively studied in this context (Parsek *et al.*, 1997; Cornell & Riscoe, 1998; Parsek *et al.*, 1999; Rumbaugh *et al.*, 1999; Pai *et al.*, 2012; Gupta & Schuster, 2013), as has the activity and impact of many microbial genes including ones that would create a fitness cost that might induce compensatory changes in the native genetic background. Furthermore, the AHLs studied here have been added exogenously to *E. coli* within the context of other studies (e.g. QS reporter strains) without any observable toxic effect on *E. coli*. Moreover, there are plasmid borne QSSM synthase homologues which have been shown to be transferable between bacteria, and presumably this event would impose a fitness burden (Danino *et al.*, 2003; White & Winans, 2007).

Previous work has shown that the major cost to QS is the response to signal (Diggle *et al.*, 2007b). Until now, no one has demonstrated experimentally that the isolated production of the signal itself also incurs a cost. Costly signal production could influence the social environment as it could be subject to social cheating. Self-

interest can lead to a breakdown of cooperation at the group level (known as ‘the public goods dilemma’) in bacterial populations, just as it can in animal and human populations (Popat *et al.*, 2012). In environments where QS is important, social cheating on signal production could have important consequences (Brown & Johnstone, 2001). In an infection scenario, it could affect the production of QS-controlled virulence factors. Signal cheating could thus lead to a loss in the ability of bacteria to infect their target hosts (West *et al.*, 2012).

Although *E. coli* contains a protein capable of responding to the production of AHLs (SdiA) (Michael *et al.*, 2001; Yao *et al.*, 2006; Smith *et al.*, 2011; Swearingen *et al.*, 2013), there is no AHL synthase, leading to the notion that *E. coli* can respond to an AHL cue from another species. It is not clear what SdiA regulates in *E. coli*, but it influences cell division, antibiotic resistance and virulence factor production when overproduced. SdiA does not preferentially bind the cognate AHLs for LasI and RhII. SdiA has been shown not to interfere with a complete Las QS signalling cassette reporter (Joint *et al.*, 2007; Soares & Ahmer, 2011), and although it can bind to the promoter of *rhII*, it does so regardless of the presence of the cognate AHL (Lindsay & Ahmer, 2005). Importantly, the AHLs detected in our experiments did not overlap significantly with the AHLs shown previously to interact and activate SdiA (Michael *et al.*, 2001; Smith & Ahmer, 2003) and the effect of AHL production upon growth of an *sdiA* mutant mirrored that of MG1655 (data not shown).

Quantification of AHL production, as expected, revealed that the most abundant AHLs were the cognate QSSMs, with pME-*lasI* and pME-*rhII* directing the production

of OC<sub>12</sub>-HSL (~30 µM, 71%) and C<sub>4</sub>-HSL (~40 µM, 95%) respectively at the highest IPTG concentration used (supplementary Figure 2c,d). These quantities are broadly in line with AHL production in *P. aeruginosa* where concentrations of 0.5 to 15 µM for OC<sub>12</sub>-HSL and 5-31 µM for C<sub>4</sub>-HSL have previously been reported (Pearson *et al.*, 1994; Pearson *et al.*, 1995; Cataldi *et al.*, 2008; Ortori *et al.*, 2011).

Such QSSM levels only created a marginal growth defect in rich media supporting our assumption, based on the use of healthy *E. coli* AHL bioreporters, that they would not be toxic (supplementary Figure 4e, 5e). Reduction of signal synthesis, by titration of IPTG, reduced AHLs to undetectable levels and concomitantly repaired the observed growth defects. The extended AHL profile for *E. coli* RhII-producer was limited to AHLs comprising short acyl chains. In contrast, 9 different long chain AHLs were detected in addition to the cognate OC<sub>12</sub>-HSL in the spent culture supernatants of the LasI-producer, with the quantities of the OC-series dominating. In both cases, the relative lack of leakiness of the IPTG induced promoter was evident by the relatively low levels of AHLs detected in the absence of IPTG. It was not clear why the RhII inactive mutant S103E did not migrate with the same mobility as all other RhII proteins analysed, but this may reflect a difference in conformational structure that in turn may influence AHL production by this particular protein.

The observation that growth defects resulting from the introduction of AHL production were more prominent in MMM supports our hypothesis that the metabolic drain of AHL production would occur via the AMC since previous studies have shown that disruption of the AMC is more readily reflected in growth defects in defined

media limited for the sulphur sources that feed into this pathway (Winzer *et al.*, 2003; Doherty *et al.*, 2006; Heurlier *et al.*, 2009; Holmes *et al.*, 2009; Doherty *et al.*, 2010).

The approximate energy cost of AHL production was crudely calculated. It has been estimated that an *E. coli* cell contains 12.1 billion ATP molecules (Stouthamer, 1973). Using a value of 30  $\mu$ M corresponding to the highest concentration of OC<sub>12</sub>-HSL observed at 1 mM IPTG, we estimate the total cost of ATP production to be a significant energetic cost at ~7% of the ATP.

This is in line with metabolic perturbations of QS (Davenport, P., Griffin, J.L., Welch, M., 2015), however has to be further investigated experimentally to accurately reflect the metabolite turnover in the conditions studied. The ability of the RhII-producer to achieve the same final population density as the non-producer may reflect a delay in the collective benefit of QS. The production of QS-regulated public goods does not instantly exceed the cost of QSSM production. Once the population density reaches a threshold, the associated high level of QSSMs may provide a greater benefit in the context of QS regulated public goods production (Pai *et al.*, 2012). Interestingly, measurement of population density by OD in Figure 1 indicated an approximate 10-fold fitness advantage in monoculture compared to the approximate 4-fold change in relative fitness calculated for Figure 4 between non-producer and LasI-producer using viable cells (CFU). It was notable that in mixed culture (Figure 4), the faster growth of the non-producer did not exhaust the overall nutrient supply and thereby greatly reduce the fitness estimate of LasI-producer in mixed culture compared to that in monoculture. It is not clear what the underlying reason for this is, or why LasI-producer is fitter than the control in the uninduced mixed culture compared to the

uninduced monoculture in Figure 4 given that *E. coli* is incapable of responding to AHL signals and thus not participating in a compensatory production of beneficial public goods. This observation suggests that LasI-producer benefits from the presence of the other strain. There is a wide spread of relative fitness estimates for the uninduced mixed culture over the 4 parallel samples which may be reduced through inclusion of further replicas, but it is also possible that the control strain reaches stationary phase quickly, and some of the population lyses releasing nutrients that the LasI-producer can use to grow on, leading to a rise in viable cells. Whatever the underlying reason, this finding accentuates the main finding of this experiment: that producing the AHL synthase is costly when in the context of a mixed culture. It would be interesting to extend this approach by determining the relative fitness of the different AHL-producing mutants that we generated and also to determine whether RhII-producers (that begin growing slowly but ultimately reach densities equal to non-producers in monoculture) are disadvantaged in mixed populations. Extending these studies would also facilitate measuring rates of ATP/signal turnover per cell during growth to enable calculations of the energetic cost of signal production to relate to theoretical values.

Interestingly, despite the LasI protein being produced at a higher level, the total level of AHLs and the level of the cognate AHL synthesized by LasI were similar to those made by RhII (supplementary Figure 2, 4a and 5a). The greater effect this had upon growth is likely to result in part from the need for the longer acyl chain on the AHLs made by LasI (12 carbons compared to 4 carbons on the cognate AHLs of LasI and RhII respectively). This would require greater metabolic investment from fatty acid biosynthesis pathways and thereby invoke a greater fitness cost. Despite the similar

overall AHL levels, which would be predicted to require similar levels of the other shared substrate (SAM) and thus other AMC-related metabolites, there was a more substantial drain on SAM and other AMC metabolites that led to a corresponding fall in AI-2 and rise in MTA levels which in turn could influence polyamine levels since MTA is a feed-back inhibitor of polyamine synthesis. The reason for this requires further investigation, but could reflect changes in metabolic flux through the AMC triggered by the relative demands on fatty acid metabolism which are linked via cysteine (which feeds into coenzyme A biosynthesis and also the AMC).

The correspondence between the higher level of LasI production and a more dramatic effect on growth and metabolite levels, offers the potential to titrate in effects on fitness gradually by manipulating levels of AHL synthase production. This enhances the potential of using QS bacteria as a model to test aspects of signalling theory by experimentally manipulating the cost (Smith & Harper, 2003). Furthermore, revealing that the production of AHLs perturbs the levels of central metabolites within bacteria and has a knock-on effect on cell fitness provides impetus to drive the development of novel medical intervention strategies given the contribution of QS to virulence. The design of future therapeutic agents may include the previously proposed exploitation of QS by free-loaders (bacteria that neither produce nor respond to QSSMs) to reduce population size and virulence (Allen *et al.*, 2014). Another alternative would be to exploit the finding here that the fitness cost of QSSM production is dependent upon the supply of nutrients. As proposed in (Hall *et al.*, 2011), administering QSSMs alongside the antibiotic rifampicin would induce the expression of many genes including the QSSM synthases, thereby creating an increased demand for RNA polymerase and elevating the cost of rifampicin

resistance. Such constraints on the evolution of resistance may prolong the utility of antibiotics, both current and future.

## Acknowledgements

We thank Alex Truman for the synthesis and provision of QSSMs. This study was supported by funds from the European Union, Biotechnology and Biological Sciences Research Council, Natural Environment Research Council, Libyan Government and Royal Society.

## References

- Allen, R. C., Popat, R., Diggle, S. P., & Brown, S. P. (2014) Targeting virulence: can we make evolution-proof drugs? *Nat Rev Microbiol* **12**: 300-308.
- Atkinson, S., & Williams, P. (2009) Quorum sensing and social networking in the microbial world. *Journal of The Royal Society Interface* **6**: 959-978.
- Brown, S. P., & Johnstone, R. A. (2001) Cooperation in the dark: signaling and collective action in quorum-sensing bacteria. *Proceedings of the Royal Society of London Series B: Biological Sciences* **268**: 961-965.
- Cataldi, T. R., Bianco, G., & Abate, S. (2008) Profiling of *N*-acyl-homoserine lactones by liquid chromatography coupled with electrospray ionization and a hybrid quadrupole linear ion-trap and Fourier-transform ion-cyclotron-resonance mass spectrometry (LC-ESI-LTQ-FTICR-MS). *J Mass Spectrom* **43**: 82-96.
- Cooksley, C., Jenks, P. J., Green, A., Cockayne, A., Logan, R. P., & Hardie, K. R. (2003) NapA protects *Helicobacter pylori* from oxidative stress damage, and its production is influenced by the ferric uptake regulator. *J Med Microbiol* **52**: 461-469.
- Cooper, D. L., Lahue, R. S., & Modrich, P. (1993) Methyl-directed mismatch repair is bidirectional. *J Biol Chem* **268**: 11823-11829.
- Cornell, K. A., & Riscoe, M. K. (1998) Cloning and expression of *Escherichia coli* 5'-methylthioadenosine/*S*-adenosylhomocysteine nucleosidase: Identification of the *pfs* gene product. *Biochimica et Biophysica Acta (BBA) - Gene Structure and Expression* **1396**: 8-14.



- Danino, V. E., Wilkinson, A., Edwards, A., & Downie, J. A. (2003) Recipient-induced transfer of the symbiotic plasmid pRL1Jl in *Rhizobium leguminosarum* bv. *viciae* is regulated by a quorum-sensing relay. *Mol Microbiol* **50**: 511-525.
- Dante, R., Arnaud, M., & Niveleau, A. (1983) Effects of 5'deoxy-5'-methylthioadenosine on the metabolism of S-adenosyl methionine. *Biochem Biophys Res Commun* **114**: 214-221.
- Darch, S. E., West, S. A., Winzer, K., & Diggle, S. P. (2012) Density-dependent fitness benefits in quorum-sensing bacterial populations. *Proc Natl Acad Sci U S A* **109**: 8259-8263.
- Davenport, P., Griffin, J.L., Welch, M. (2015) Quorum sensing is accompanied by global metabolic changes in the opportunistic human pathogen, *Pseudomonas aeruginosa* *J Bacteriol* **JB.02557-14.**: [Epub ahead of print].
- Diggle, S., Griffin, A., Campbell, G., & West, S. (2007a) Cooperation and conflict in quorum-sensing bacterial populations. *Nature* **4500**: 411-414.
- Diggle, S. P., Gardner, A., West, S. A., & Griffin, A. S. (2007b) Evolutionary theory of bacterial quorum sensing: when is a signal not a signal? *Philosophical Transactions of the Royal Society B: Biological Sciences* **362**: 1241-1249.
- Doherty, N., Holden, M. T., Qazi, S. N., Williams, P., & Winzer, K. (2006) Functional analysis of *luxS* in *Staphylococcus aureus* reveals a role in metabolism but not quorum sensing. *J Bacteriol* **188**: 2885-2897.
- Doherty, N. C., Shen, F., Halliday, N. M., Barrett, D. A., Hardie, K. R., Winzer, K., & Atherton, J. C. (2010) In *Helicobacter pylori*, LuxS is a key enzyme in cysteine provision through a reverse transsulfuration pathway. *J Bacteriol* **192**: 1184-1192.
- Farinha, M. A., & Kropinski, A. M. (1990) High efficiency electroporation of *Pseudomonas aeruginosa* using frozen cell suspensions. *FEMS Microbiol Lett* **58**: 221-225.
- Fox, J., & Weisberg, S. (2011) *An R Companion to Applied Regression*. Second edn. Thousand Oaks CA, Sage,
- Gupta, R., & Schuster, M. (2013) Negative regulation of bacterial quorum sensing tunes public goods cooperation. *ISME J*
- Haigh, R., Kumar, B., Sandrini, S., & Freestone, P. (2013) Mutation design and strain background influence the phenotype of *Escherichia coli luxS* mutants. *Mol Microbiol* **88**: 951-969.
- Hall, A. R., Iles, J. C., & MacLean, R. C. (2011) The fitness cost of rifampicin resistance in *Pseudomonas aeruginosa* depends on demand for RNA polymerase. *Genetics* **187**: 817-822.
- Halliday, N. M., Hardie, K. R., Williams, P., Winzer, K., & Barrett, D. A. (2010) Quantitative liquid chromatography-tandem mass spectrometry profiling of activated methyl cycle metabolites involved in LuxS-dependent quorum sensing in *Escherichia coli*. *Anal Biochem* **403**: 20-29.
- Hardie, K. R., & Heurlier, K. (2008) Establishing bacterial communities by 'word of mouth': LuxS and autoinducer 2 in biofilm development. *Nat Rev Microbiol* **6**: 635-643.

- Heurlier, K., Vendeville, A., Halliday, N., Green, A., Winzer, K., Tang, C. M., & Hardie, K. R. (2009) Growth deficiencies of *Neisseria meningitidis* *pfs* and *luxS* mutants are not due to inactivation of Quorum Sensing. *J Bacteriol* **191**: 1293-1302.
- Hoang, T. T., & Schweizer, H. P. (1999) Characterization of *Pseudomonas aeruginosa* enoyl-acyl carrier protein reductase (FabI): a target for the antimicrobial triclosan and its role in acylated homoserine lactone synthesis. *J Bacteriol* **181**: 5489-5497.
- Holmes, K., Tavender, T. J., Winzer, K., Wells, J. M., & Hardie, K. R. (2009) AI-2 does not function as a quorum sensing molecule in *Campylobacter jejuni* during exponential growth *in vitro*. *BMC Microbiol* **9**: 214.
- Jiang, Y., Camara, M., Chhabra, S. R., Hardie, K. R., Bycroft, B. W., Lazdunski, A. et al. (1998) *In vitro* biosynthesis of the *Pseudomonas aeruginosa* quorum-sensing signal molecule *N*-butanoyl-L-homoserine lactone. *Mol Microbiol* **28**: 193-203.
- Joint, I., Allan Downie, J., & Williams, P. (2007) Bacterial conversations: talking, listening and eavesdropping. An introduction. *Philosophical Transactions of the Royal Society B: Biological Sciences* **362**: 1115-1117.
- Keller, L., & Surette, M. G. (2006) Communication in bacteria: an ecological and evolutionary perspective. *Nat Rev Microbiol* **4**: 249-258.
- Kohler, T., Perron, G. G., Buckling, A., & van Delden, C. (2010) Quorum sensing inhibition selects for virulence and cooperation in *Pseudomonas aeruginosa*. *PLoS Pathog* **6**: e1000883.
- Lindsay, A., & Ahmer, B. M. (2005) Effect of *sdiA* on biosensors of *N*-acylhomoserine lactones. *J Bacteriol* **187**: 5054-5058.
- Low, D. A., Weyand, N. J., & Mahan, M. J. (2001) Roles of DNA adenine methylation in regulating bacterial gene expression and virulence. *Infection and Immunity* **69**: 7197-7204.
- Michael, B., Smith, J. N., Swift, S., Heffron, F., & Ahmer, B. M. (2001) SdiA of *Salmonella enterica* is a LuxR homolog that detects mixed microbial communities. *J Bacteriol* **183**: 5733-5742.
- More, M. I., Finger, L. D., Stryker, J. L., Fuqua, C., Eberhard, A., & Winans, S. C. (1996) Enzymatic synthesis of a quorum-sensing autoinducer through use of defined substrates. *Science* **272**: 1655-1658.
- Ortori, C. A., Dubern, J. F., Chhabra, S. R., Camara, M., Hardie, K., Williams, P., & Barrett, D. A. (2011) Simultaneous quantitative profiling of *N*-acyl-L-homoserine lactone and 2-alkyl-4(1*H*)-quinolone families of quorum-sensing signaling molecules using LC-MS/MS. *Anal Bioanal Chem* **399**: 839-850.
- Pai, A., Tanouchi, Y., & You, L. (2012) Optimality and robustness in quorum sensing (QS)-mediated regulation of a costly public good enzyme. *Proc Natl Acad Sci U S A* **109**: 19810-19815.
- Palaniyandi, S., Mitra, A., Herren, C. D., Zhu, X., & Mukhopadhyay, S. (2013) LuxS contributes to virulence in avian pathogenic *Escherichia coli* O78:K80:H9. *Vet Microbiol* **166**: 567-575.

- Parsek, M. R., Schaefer, A. L., & Greenberg, E. P. (1997) Analysis of random and site-directed mutations in *rhII*, a *Pseudomonas aeruginosa* gene encoding an acylhomoserine lactone synthase. *Mol Microbiol* **26**: 301-310.
- Parsek, M. R., Val, D. L., Hanzelka, B. L., Cronan, J. E., Jr, & Greenberg, E. P. (1999) Acyl homoserine-lactone quorum-sensing signal generation. *Proc Natl Acad Sci U S A* **96**: 4360-4365.
- Pearson, J. P., Passador, L., Iglewski, B. H., & Greenberg, E. P. (1995) A second N-acylhomoserine lactone signal produced by *Pseudomonas aeruginosa*. *Proc Natl Acad Sci U S A* **92**: 1490-1494.
- Pearson, J. P., Gray, K. M., Passador, L., Tucker, K. D., Eberhard, A., Iglewski, B. H., & Greenberg, E. P. (1994) Structure of the autoinducer required for expression of *Pseudomonas aeruginosa* virulence genes. *Proc Natl Acad Sci U S A* **91**: 197-201.
- Pollitt, E. J. G., West, S. A., Crusz, S. A., Burton-Chellew, M. N., & Diggle, S. P. (2014) Cooperation, quorum sensing and the evolution of virulence in *Staphylococcus aureus*. *Infection and Immunity* **82**: 1045-1051.
- Popat, R., Pollitt, E. J., Harrison, F., Naghra, H., Hong, K. W., Chan, K. G. et al. (2015) Conflict of interest and signal interference lead to the breakdown of honest signaling. *Evolution* **69**: 2371-2381.
- Popat, R., Crusz, S. A., Messina, M., Williams, P., West, S. A., & Diggle, S. P. (2012) Quorum-sensing and cheating in bacterial biofilms. *Proc Biol Sci* **279**: 4765-4771.
- R Development, C. T. (2011) *R: a language and environment for statistical computing*. <http://www.R-project.org>. Vienna Austria, R Foundation for Statistical Computing.,
- Raychaudhuri, A., Jerga, A., & Tipton, P. A. (2005) Chemical mechanism and substrate specificity of RhII, an acylhomoserine lactone synthase from *Pseudomonas aeruginosa*. *Biochemistry* **44**: 2974-2981.
- Rumbaugh, K. P., Diggle, S. P., Watters, C. M., Ross-Gillespie, A., Griffin, A. S., & West, S. A. (2009) Quorum sensing and the social evolution of bacterial virulence. *Curr Biol* **19**: 341-345.
- Rumbaugh, K. P., Griswold, J. A., Iglewski, B. H., & Hamood, A. N. (1999) Contribution of quorum sensing to the virulence of *Pseudomonas aeruginosa* in burn wound infections. *Infection and Immunity* **67**: 5854-5862.
- Sambrook, J., Fritsch, E. F., & Maniatis, T. (1989) *Molecular cloning: a laboratory manual*. **2**:
- Smith, M. J., & Harper, D. G. C. (2003) *Animal Signals*. Oxford, Oxford University Press,
- Smith, J. L., Fratafico, P. M., & Yan, X. (2011) Eavesdropping by bacteria: the role of SdiA in *Escherichia coli* and *Salmonella enterica* serovar Typhimurium quorum sensing. *Foodborne Pathog Dis* **8**: 169-178.
- Smith, J. N., & Ahmer, B. M. (2003) Detection of other microbial species by *Salmonella*: expression of the SdiA regulon. *J Bacteriol* **185**: 1357-1366.
- Soares, J. A., & Ahmer, B. M. (2011) Detection of acyl-homoserine lactones by *Escherichia* and *Salmonella*. *Curr Opin Microbiol* **14**: 188-193.

- Stouthamer, A. H. (1973) A theoretical study on the amount of ATP required for synthesis of microbial cell material. . *Antonie van Leeuwenhoek* **39**: 545-565.
- Swearingen, M. C., Sabag-Daigle, A., & Ahmer, B. M. (2013) Are there acyl-homoserine lactones within mammalian intestines? *J Bacteriol* **195**: 173-179.
- Vendeville, A., Winzer, K., Heurlier, K., Tang, C. M., & Hardie, K. R. (2005) Making 'sense' of metabolism: autoinducer-2, LuxS and pathogenic bacteria. *Nat Rev Microbiol* **3**: 383-396.
- West, S. A., Winzer, K., Gardner, A., & Diggle, S. P. (2012) Quorum sensing and the confusion about diffusion. *Trends Microbiol* **20**: 586-594.
- White, C. E., & Winans, S. C. (2007) Cell-cell communication in the plant pathogen *Agrobacterium tumefaciens*. *Philos Trans R Soc Lond B Biol Sci* **362**: 1135-1148.
- Wilder, C. N., Diggle, S. P., & Schuster, M. (2011) Cooperation and cheating in *Pseudomonas aeruginosa*: the roles of the *las*, *rhl* and *pqs* quorum-sensing systems. *ISME J* **5**: 1332-1343.
- Williams, P., & Cámara, M. (2009) Quorum sensing and environmental adaptation in *Pseudomonas aeruginosa*: a tale of regulatory networks and multifunctional signal molecules. *Curr Opin Microbiol* **12**: 182-191.
- Winson, M., Swift, S., Hill, P., Sims, C., Griesmayr, G., Bycroft, B. et al. (1998) Engineering the *luxCDABE* genes from *Photobacterium luminescens* to provide a bioluminescent reporter for constitutive and promoter probe plasmids and mini-Tn5 constructs. *FEMS Microbiol Lett* **163**: 193-202.
- Winzer, K., Hardie, K. R., & Williams, P. (2003) LuxS and autoinducer-2: their contribution to quorum sensing and metabolism in bacteria. *Adv Appl Microbiol* **53**: 291-396.
- Yao, Y., Martinez-Yamout, M. A., Dickerson, T. J., Brogan, A. P., Wright, P. E., & Dyson, H. J. (2006) Structure of the *Escherichia coli* quorum sensing protein SdiA: activation of the folding switch by Acyl Homoserine Lactones. *J Mol Biol* **355**: 262-273.

## Figure Legends

**Fig. 1. QSSM synthesis alters the fitness of bacteria.** Three *E. coli* strains non-producer MG1655(pME6032), LasI-producer MG1655(pME-*lasI*), and RhII-producer MG1655(pME-*rhlI*) were inoculated into 125 ml MMM + tetracycline + IPTG and grown with shaking at 37 °C in 500 ml. Optical density at 600 nm and the data are indicated as means ± standard deviations for three independent cultures.

**Fig. 2. AHL synthases reduce levels of AMC-linked metabolites including the native QSSM AI-2, whilst intracellular MTA levels increase. Panel (a)** Metabolite levels were determined in three *E. coli* strains MG1655(pME6032), MG1655(pME-*lasI*) and MG1655(pME-*rhlI*) grown in LB + tetracycline with and without IPTG. Intracellular accumulation of SAM, SAH, SRH, HCY and MET were determined by LC-MS analysis. SAM and MET levels represent the most and least profound modulation respectively. Peak area corresponding to each compound was divided by the peak area of the appropriate internal standard (IS) for normalisation. **Panel (b)** Intracellular accumulation of MTA in similarly grown MG1655Δ*pfs*(pME6032), MG1655Δ*pfs* (pME-*lasI*) and MG1655Δ*pfs* (pME-*rhlI*). **Panel c)** Spent culture supernatants were prepared from MG1655(pME6032), MG1655(pME-*lasI*) and MG1655(pME-*rhlI*) grown in LB + tetracycline with and without IPTG until an OD<sub>600</sub> of 0.75, 0.80 and 0.88. The average bioluminescence induced by AI-2 reporter *V. harveyi* strain after 2 h incubation is shown. Metabolite levels for a single experiment are shown, although the experiment has been repeated three times with similar results.

**Fig. 3. Exogenous methionine addition partially rescues the growth defect imposed by QSSM synthases.** MG1655(pME6032) (solid line) and MG1655(pME-*lasI*) (broken lines) were inoculated into MMM + tetracycline, IPTG induced and methionine was added to cultures of MG1655(pME-*lasI*) at time zero. Selected methionine concentrations (μM) are shown. Strains were grown in an automated microplate reader (TECAN Infinite F200) and changes in cell density (OD<sub>600</sub>) monitored. The data are means ± standard deviations for three independent experiments.



**Fig. 4. LasI imposes a fitness cost within a mixed population.** *E. coli* MG1655(pME6032), *E. coli* MG1655(pME-*lasI*) or a 1:1 mixture of the two strains were grown. Colony counts were used to calculate the total population density. To determine the population density of each strain in mixed populations, cfu was assessed (**Panel a**). The evolutionary fitness of *E. coli* MG1655(pME-*lasI*) relative to *E. coli* MG1655(pME6032) in mixed populations is plotted (**Panel b**). When the two genotypes have equal fitness,  $v = 1$ . Values of  $v < 1$  reflect being outcompeted by MG1655(pME6032) and values  $> 1$  indicate that MG1655(pME-*lasI*) outcompetes MG1655(pME6032). The relative fitness of *E. coli* MG1655(pME-*lasI*) in pure culture was calculated by randomly pairing pure MG1655(pME-*lasI*) and MG1655(pME6032) populations within IPTG treatment.

## Supplementary Material

**Supplementary Fig. 1. The activated methyl cycle of (a) *P. aeruginosa* and (b) *E. coli*.**

**Supplementary Fig. 2. AHL synthases direct the synthesis of their cognate QSSMs in a heterologous host.**

**Supplementary Fig. 3. RhII modelling to inform the creation of catalytically inactive QSSM synthase mutants.**

**Supplementary Fig. 4. QSSM synthase mutants lacking the ability to generate AHLs no longer impose a fitness cost and fail to make an impact on the levels of AMC metabolites: LasI.**

**Supplementary Fig. 5. QSSM synthase mutants lacking the ability to generate AHLs no longer impose a fitness cost and fail to make an impact on the levels of AMC metabolites: RhII.**

**Supplementary Fig. 6. Exogenous addition of QSSMs does not affect growth of a heterologous host.**

**Supplementary Table 1. Strains, plasmids and primers used in this study.**

**Supplementary Table 2. Substitutions chosen for mutagenesis of AHL**

**synthases**

**Supplementary Table 3. MTA levels in strains bearing QSSM synthases.**

**Supplementary Table 4. Intracellular concentrations of AMC metabolites**

**decrease in *E. coli* producing active QSSM synthases.**

## **Supplementary Figure Legends**

**Supplementary Fig. 1. The activated methyl cycle of (a) *P. aeruginosa* and (b) *E. coli*.** In *P. aeruginosa* SAH hydrolase (SahH) converts SAH (S-adenosyl homoserine) to HCY (homocysteine) directly, but in *E. coli* the enzymes Pfs and LuxS work sequentially generating the intermediate SRH (S-ribosyl homoserine) and the additional product DPD (4,5-dihydroxy-2,3-pentanedione) which is converted to AI-2 (autoinducer 2). In *E. coli*, Pfs has a secondary role in conversion of MTA (5'-methylthioadenosine) to MTR (5'-methylthioribose). MET: methionine, SAM: S-adenosyl-L-methionine.

**Supplementary Fig. 2. AHL synthases direct the synthesis of their cognate QSSMs in a heterologous host.** *E. coli* strains MG1655[pME6032], MG1655[pME-*rhII*] and MG1655[pME-*lasI*] were grown in LB + tetracycline until an OD<sub>600</sub> = 0.5 and induced with 1 mM IPTG for 2 h. Whole cell extracts were separated by SDS PAGE and the presence of LasI (**panel a**) was detected by Coomassie staining whilst the lower levels of RhII were detected by Immunoblotting with a specific antisera (**panel**

**b).** Quantitative profiling of AHLs produced by the same strains was undertaken by extracting with acidified ethyl acetate from LB or late exponential phase supernatants of *E. coli* strains MG1655[pME6032] ( $OD_{600} = 0.8$ ), MG1655[pME-*lasI*] ( $OD_{600} = 0.9$ ), and MG1655[pME-*rhII*] ( $OD_{600} = 0.9$ ) grown in LB containing IPTG. The actual concentration ( $\mu\text{M}$ ) determined by LC-MS/MS analysis of AHLs described in Experimental Procedures for *lasI* (**c**) and *rhII* (**d**) is shown. Of the 11 AHLs detected in cultures harvested from *lasI* induced cells OC<sub>10</sub>-HSL, OC<sub>12</sub>-HSL and OC<sub>14</sub>-HSL were the dominant signals. Other AHLs present below 5  $\mu\text{M}$  were C<sub>8</sub>-HSL, C<sub>10</sub>-HSL and C<sub>12</sub>-HSL, C<sub>14</sub>-HSL, OC<sub>6</sub>-HSL, OC<sub>8</sub>-HSL, HC<sub>12</sub>-HSL and HC<sub>14</sub>-HSL. The 4 AHLs detected in culture supernatant of MG1655[pME-*rhII*] were C<sub>4</sub>-HSL, C<sub>6</sub>-HSL, C<sub>8</sub>-HSL and HC<sub>4</sub>-HSL. The data are means  $\pm$  standard deviations for three independent extractions.

**Supplementary Fig. 3. RhII modelling to inform the creation of catalytically inactive QSSM synthase mutants.** *P. aeruginosa* RhII model (purple) was predicted using multi-template homology modelling, and utilised the structures of *P. aeruginosa* LasI (yellow) and *P. stewartii* Esal (green) (**a**). The positions of the LasI and RhII conserved residues selected for mutation in this study are shown on the ribbon (**b**) and space filling (**c**) models on the predicted structure of RhII. Colours indicate R23 (green), F28 (orange), W34 (pink) and S103W (yellow). **RhII Homology Modelling.** An atomised model of RhII was constructed using MODELLER9v7 [31] and the homologs *P. aeruginosa* LasI (30% identity with RhII sequence; pdb code 1r05) and *P. stewartii* Esal (22% identity with RhII sequence; pdb code 1kzf) as templates. The model with the lowest DOPE score [32] was chosen as the best model and used for visualization of the RhII protein. The model



was checked and hydrogen atoms added/refined using MOLPROBITY [33]. The resulting ramachandran plot demonstrated that 92.5% of model residues were in favoured regions.

**Supplementary Fig. 4. QSSM synthase mutants lacking the ability to generate AHLs no longer impose a fitness cost and fail to make an impact on the levels of AMC metabolites: LasI.** *E. coli* MG1655 bearing the empty vector (pME6032) or a derivative encoding WT LasI (pME-*lasI*), or LasI mutated to introduce the change F27L, F27Y, S103A, or S103E, were grown in the presence or absence of IPTG as indicated. The production of LasI was monitored by Coomassie staining the SDS PAGE (**panel (c)**, marked with an asterix). Size was estimated by comparison with the molecular weight markers. **Panel (a)** shows the AHLs extracted from late exponential phase supernatants of each strain with acidified ethyl acetate and profiled by LC-MS/MS analysis as described in Experimental Procedures. The ratio between the different signalling molecules present in supernatants is represented by pie charts in **Panel (d)**. The number of repeats represented is 3. **Panel (b)** Metabolite levels were determined in the same strains following growth in LB with IPTG induction until OD 0.8-0.9. Intracellular accumulation of SAM (black), SAH (white), SRH (horizontal stripes), HCY (checked) and MET (grey) was determined by LC-MS analysis. The peak area corresponding to each compound in an extract was divided by the peak area of an appropriate internal standard (IS) for normalisation; the data are the means  $\pm$  standard deviations for three independent cultures. The same *E. coli* SDM strains were inoculated into 125 ml LB + tetracycline media **Panel (e)** or MMM + tetracycline **Panel (f)** and grown shaking at 37°C in 500 ml-Erlenmeyer flasks. Aliquots (1 ml) were taken at regular intervals as indicated, and

the mean OD<sub>600</sub> values of triplicate culture samples are shown on a log<sub>10</sub> scale over time (h). Error bars indicate standard deviations from the means. Strains generating wild type levels of AHLs are indicated by the solid lines and closed symbols (pME-*lasI*, *lasI*S103A, *lasI*F27Y), those not making detectable AHLs by the dashed lines and open symbols (pME6032, *lasI*F27L, *lasI*S103E), and those producing intermediate levels by the dotted lines with cross symbols (MG1655(pME-*lasI*F27L)). The MG16 (pME6032) negative control is indicated by open squares and the positive control by closed squares: MG1655(pME-*lasI*). The symbols used in the figure are closed triangles for the *lasI*F27Y, closed circles for *lasI*S103A, open circles for *lasI*S103E.

**Supplementary Fig. 5. QSSM synthase mutants lacking the ability to generate AHLs no longer impose a fitness cost and fail to make an impact on the levels of AMC metabolites: RhII.** *E. coli* MG1655 bearing the empty vector (pME6032) or a derivative encoding WT RhII (pME-*rhlI*), or RhII mutated to introduce the change F28L, S103A, S103E, or S103V were grown in the presence or absence of IPTG as indicated. The production of RhII was monitored by immunoblotting with anti-RhII (**panel (c)**). Size was estimated by comparison to the molecular weight markers. **Panel (a)** shows the AHLs extracted from late exponential phase supernatants of each strain with acidified ethyl acetate and profiled by LC-MS/MS analysis as described in Experimental Procedures. The ratio between the different signalling molecules present in supernatants is represented by pie charts in **Panel (d)**. This was repeated 3 times. **Panel (b)** Metabolite levels were determined in the same strains following growth in LB + tetracycline with IPTG induction until OD 0.8-0.9. Intracellular accumulation of SAM (black), SAH (white), SRH (horizontal stripes),

HCY (checked) and MET (grey) was determined by LC-MS analysis. The peak area corresponding to each compound in an extract was divided by the peak area of an appropriate internal standard (IS) for normalisation; the data are the means  $\pm$  standard deviations for three independent cultures. The same *E. coli* SDM strains were inoculated into 125 ml LB + tetracycline media **Panel (e)** or MMM + tetracycline **Panel (f)** and grown shaking at 37°C in 500 ml-Erlenmeyer flasks. Aliquots (1 ml) were taken at regular intervals as indicated, and the mean OD<sub>600</sub> values of triplicate culture samples are shown on a log<sub>10</sub> scale over time (h). Error bars indicate standard deviations from the means. Strains generating wild type levels of AHLs are indicated by the solid lines and closed symbols (pME-*rhII*, *rhII*S103A, *rhII*S103V), those not making detectable AHLs by the dashed lines and open symbols (pME6032, *rhII*F27L, *rhII*S103E). The MG1655(pME6032) negative control is indicated by open squares and the positive control by closed squares: MG1655(pME-*rhII*). The symbols used in the figure are closed diamonds for the *rhII*S1-3V, closed circles for *rhII*S103A, open circles for *rhII*S103E.

**Supplementary Fig. 6. Exogenous addition of QSSMs does not affect growth of a heterologous host.** *E. coli* strain MG1655[pME6032] was grown with varying concentrations of C4-HSL or OC12-HSL added exogenously into LB (a, b) or MMM cultures (c, d) at the start of the experiment. The optical density was determined during growth every 30 min at wavelength of 600 nm using a TECAN microplate reader. Standard deviations are based on the mean values of three parallel cultures.

## Supplementary References

1] Sali, A. & Blundell, T. L. 1993 Comparative protein modelling by satisfaction of spatial restraints. *J. Mol. Biol.* **234**, 779-815.

- [2] Shen, M. Y. & Sali, A. 2006 Statistical potential for assessment and prediction of protein structures. *Protein Sci.* **15**, 2507-2524.
- [3] Davis, I. W., Leaver-Fay, A., Chen, V. B., Block, J. N., Kapral, G. J., Wang, X., Murray, L. W., Arendall, W. B., 3rd, Snoeyink, J., Richardson, J. S. & Richardson, D. C. 2007 MolProbity: all-atom contacts and structure validation for proteins and nucleic acids. *Nucleic Acids Res.* **35**, W375-83.

FIG 1

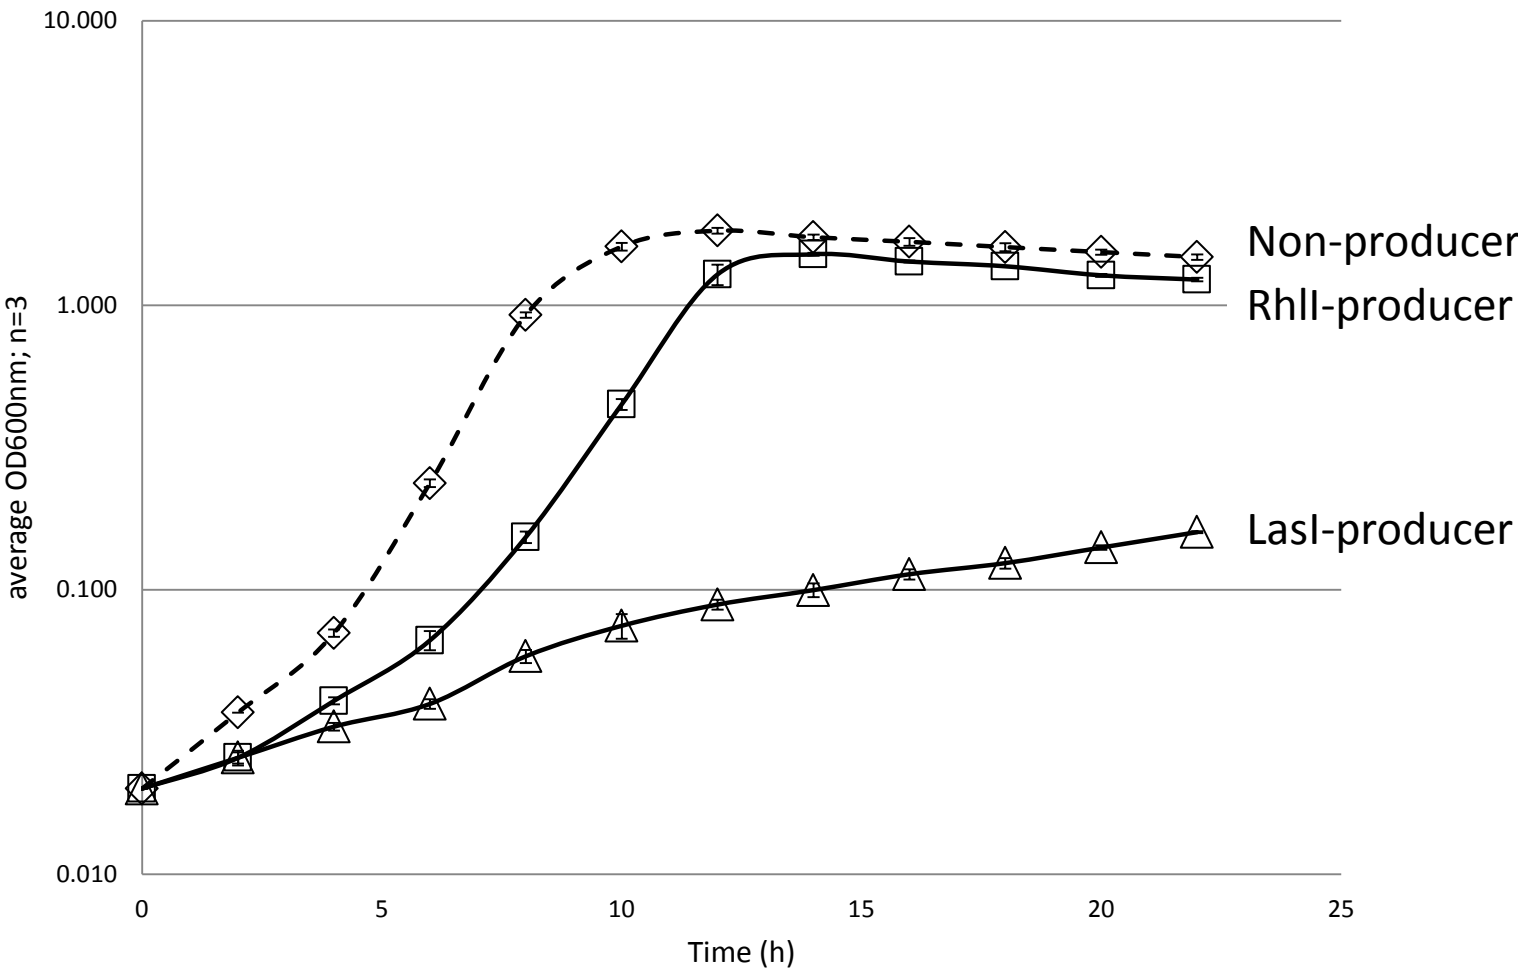

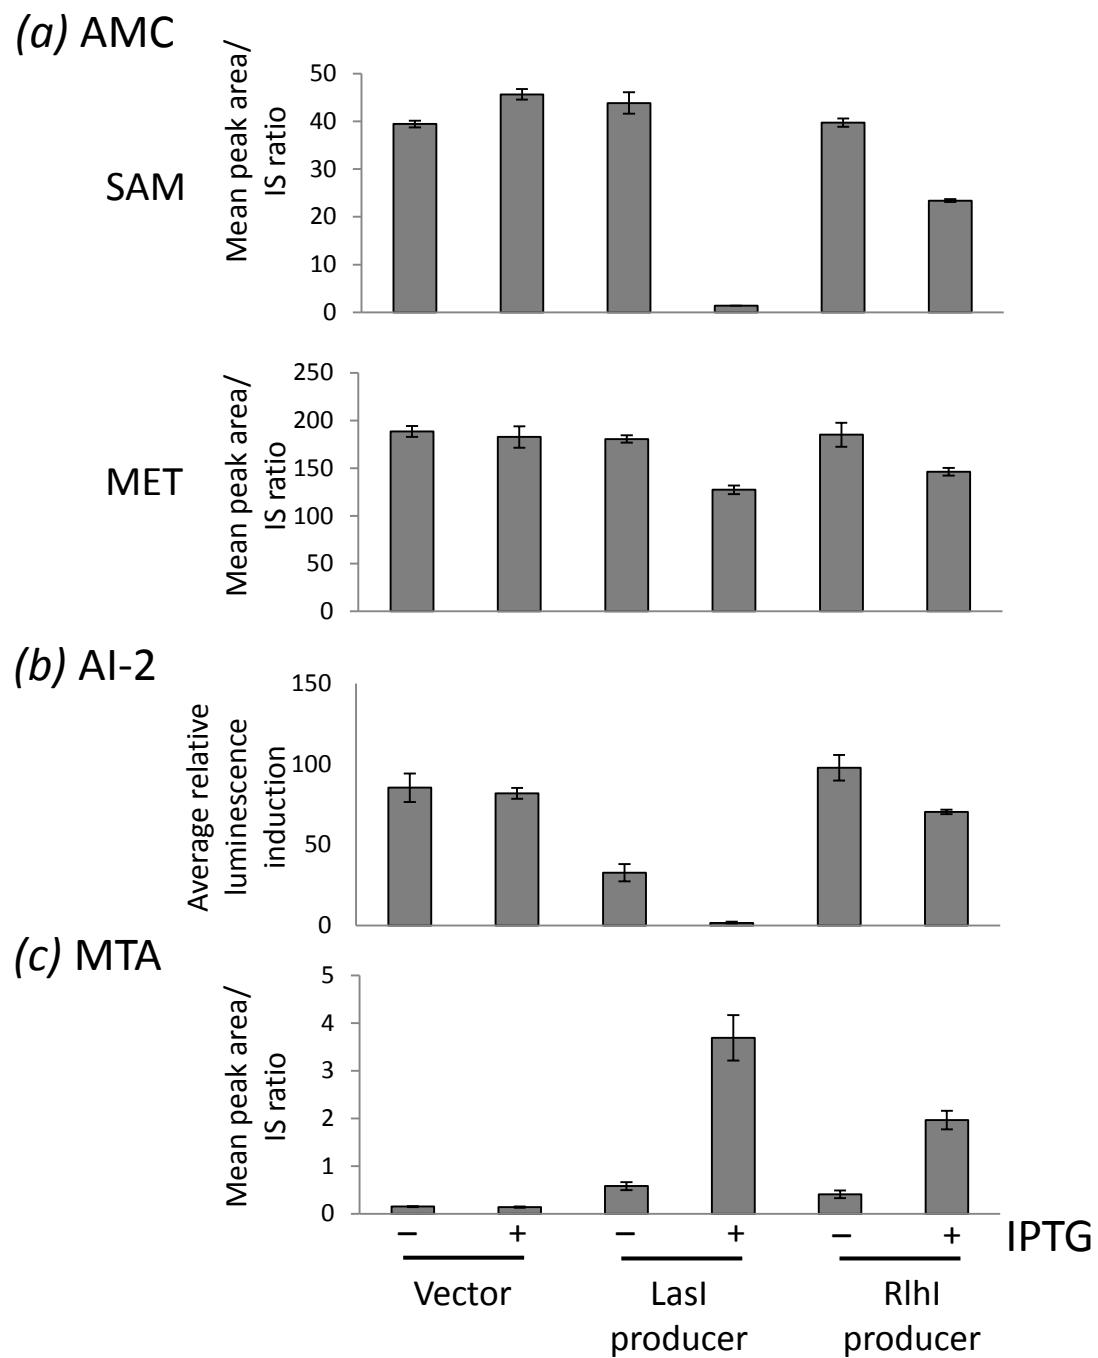

FIG 2

FIG 3

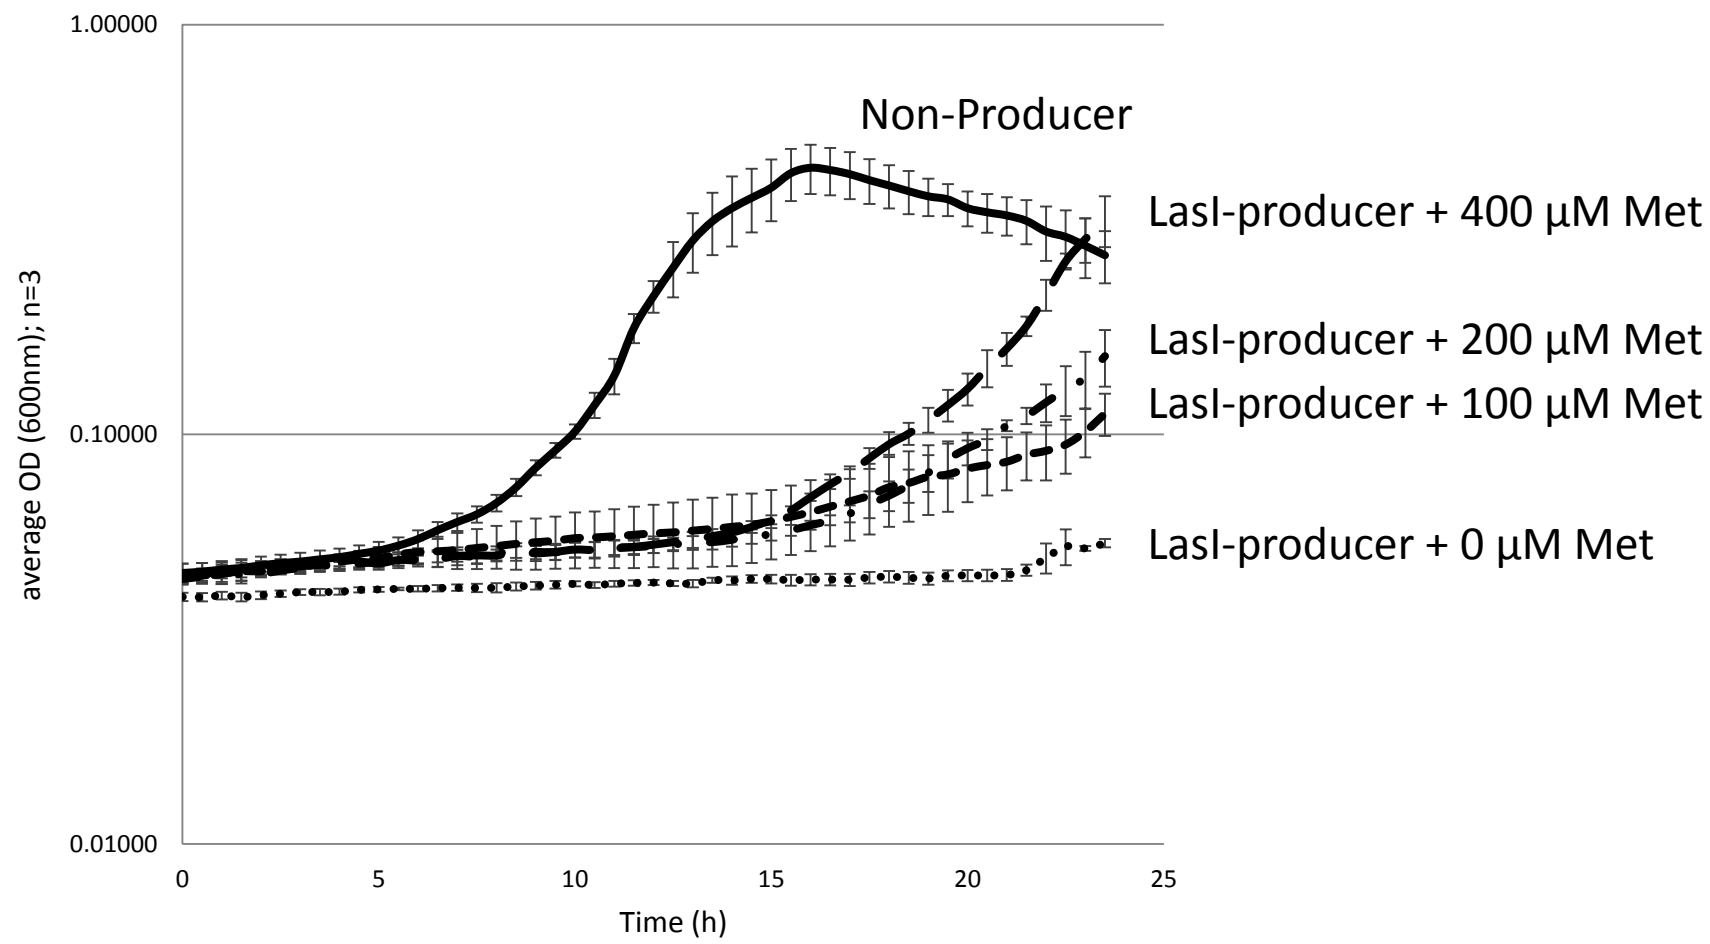

Fig 4

(a)

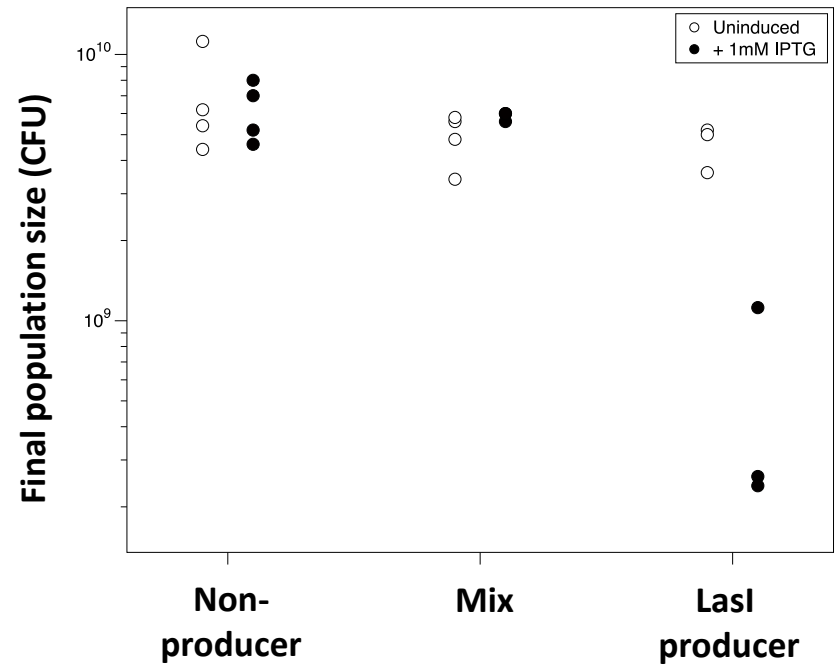

(b)

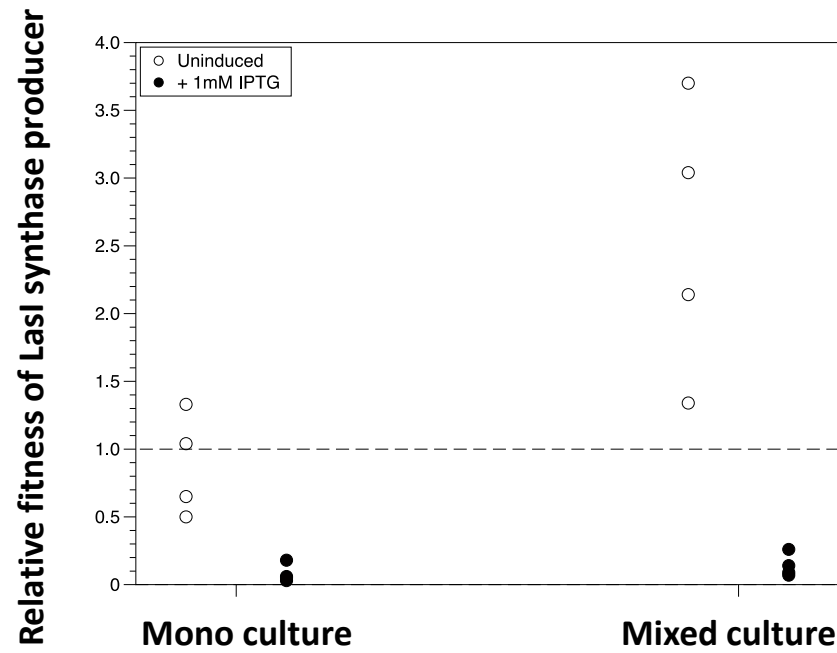



Supplementary FIG 1

(a) *P. aeruginosa*

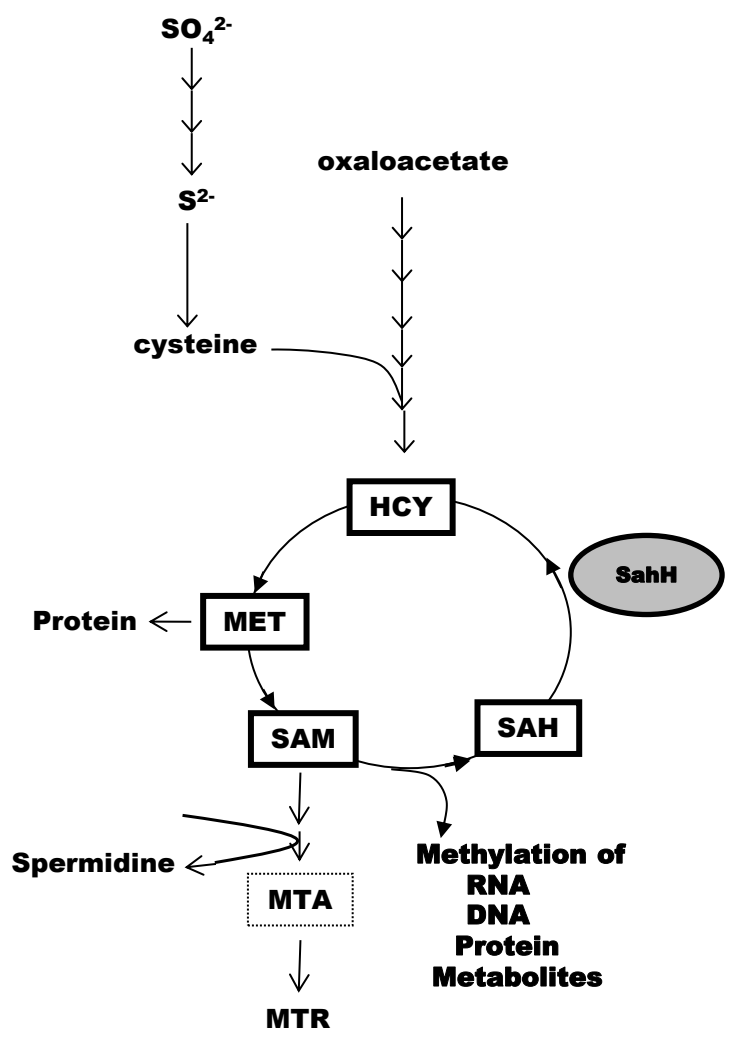

(b) *E. coli*

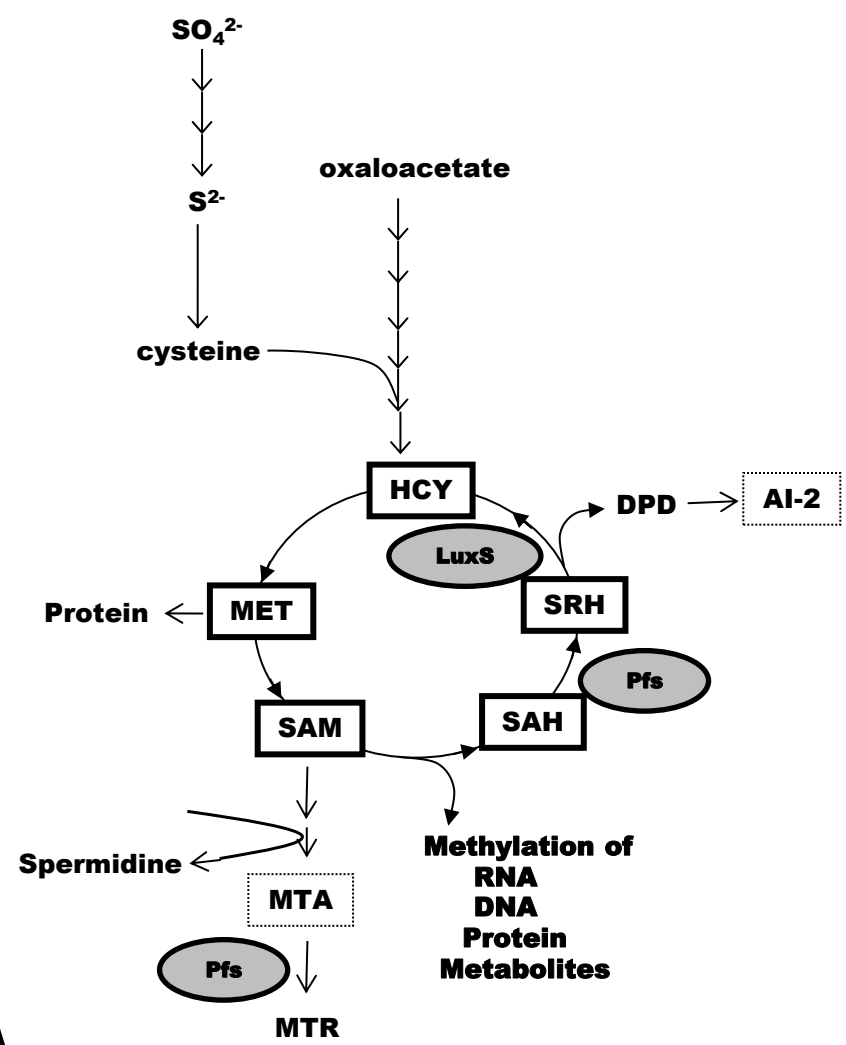

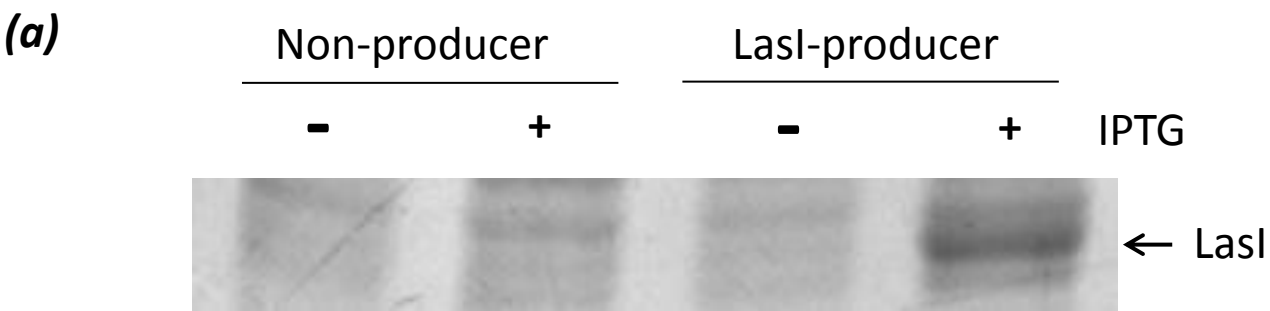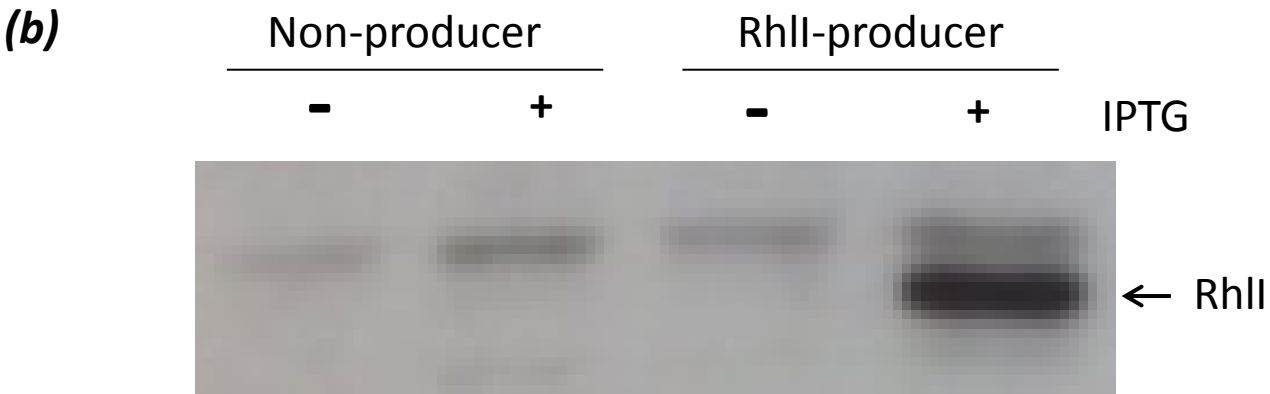

(c)

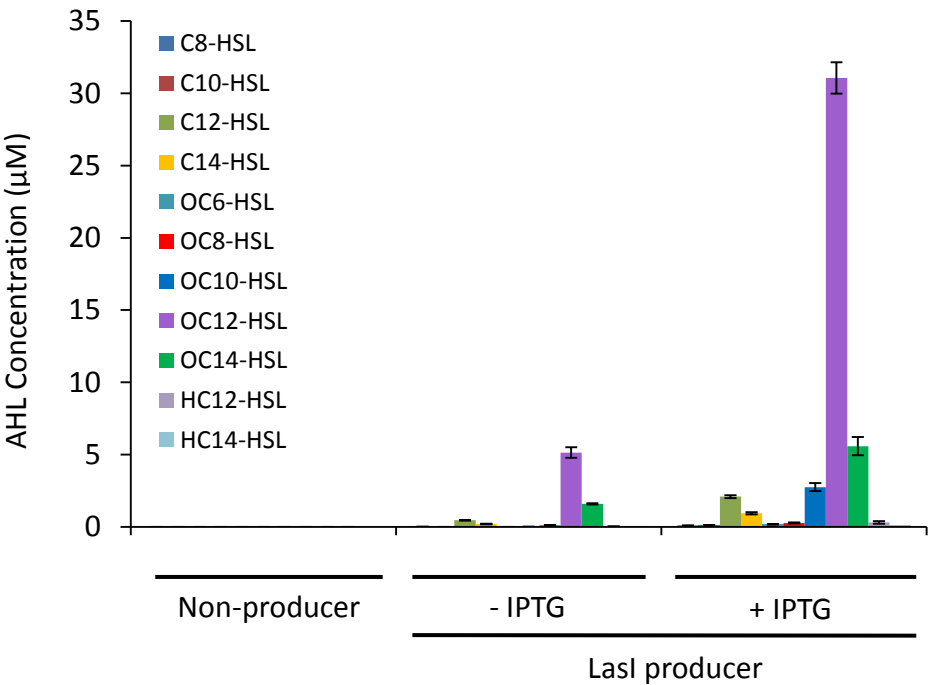

(d)

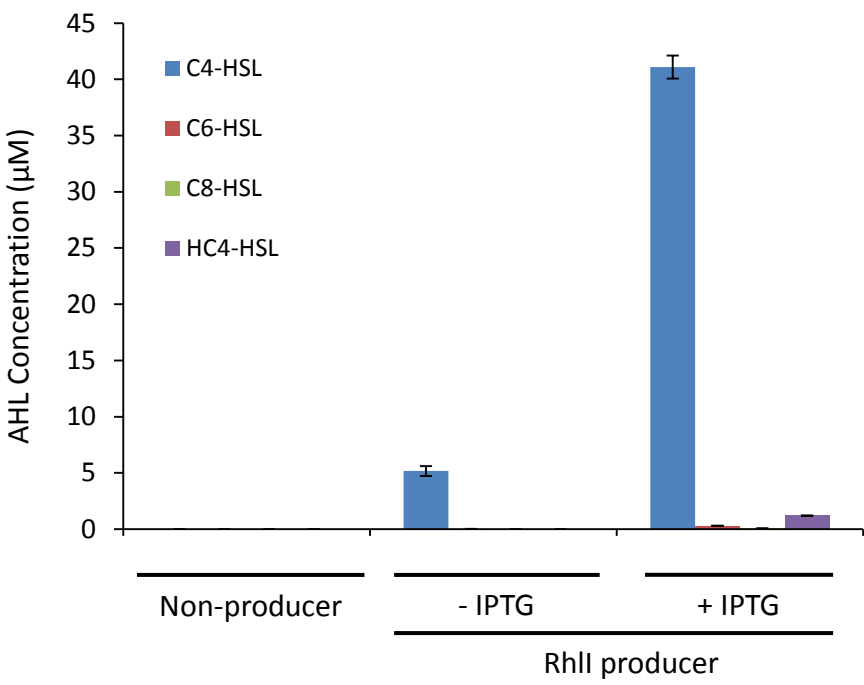

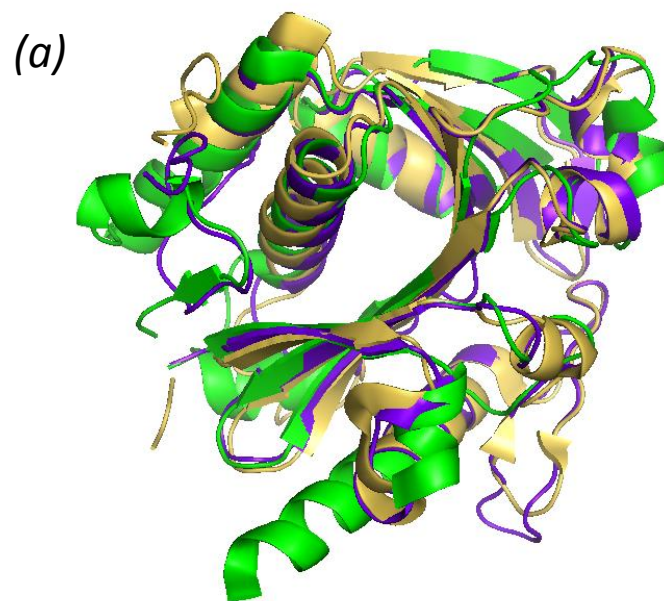

(b)

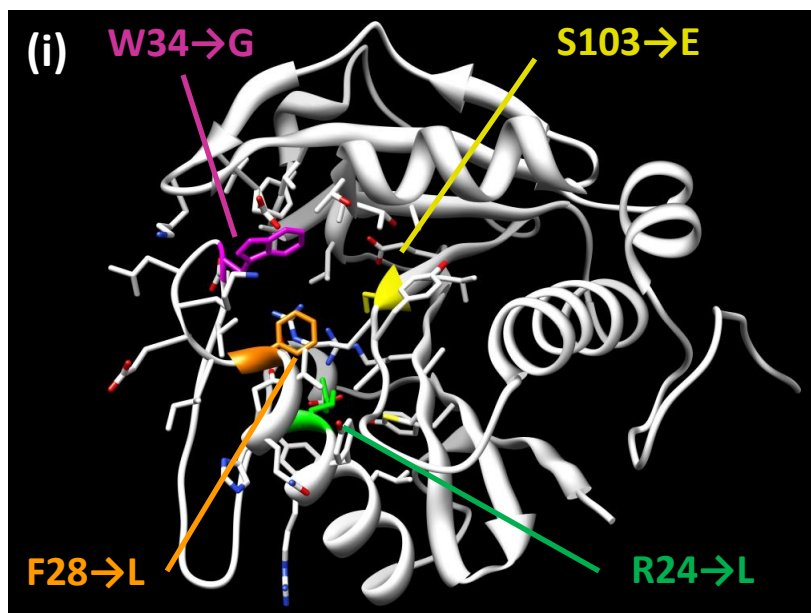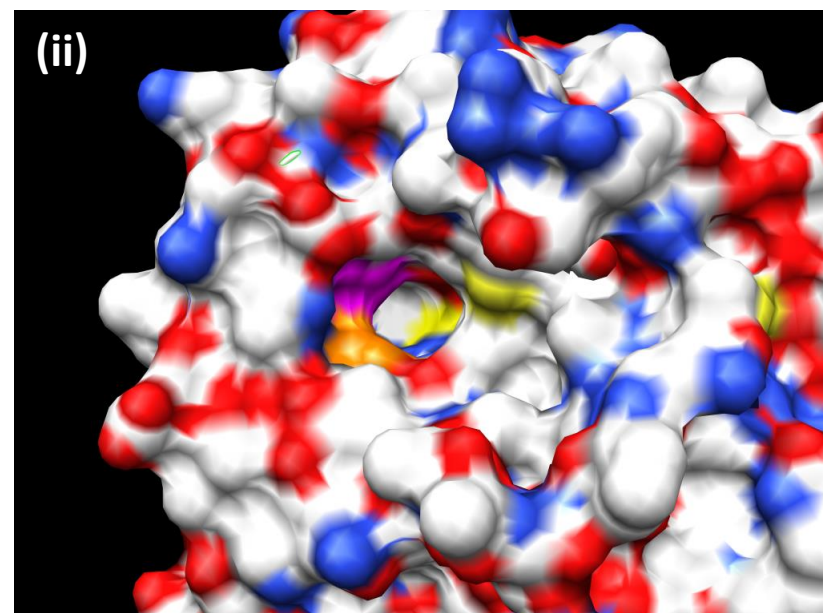

**(a)**

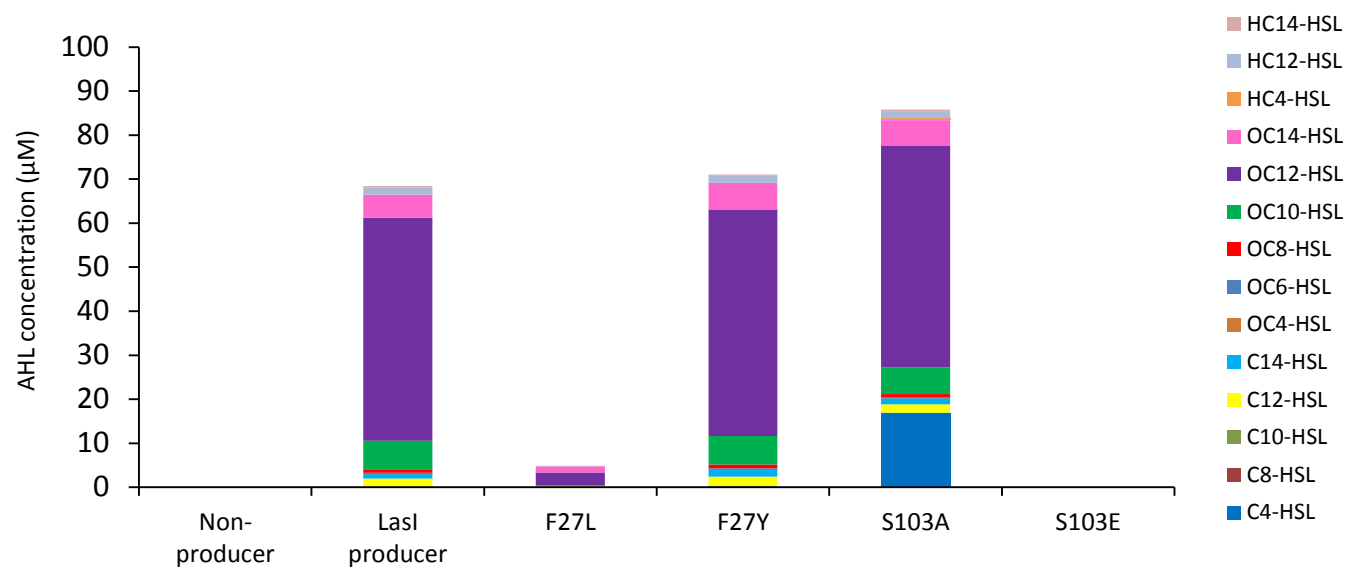

**(b)**

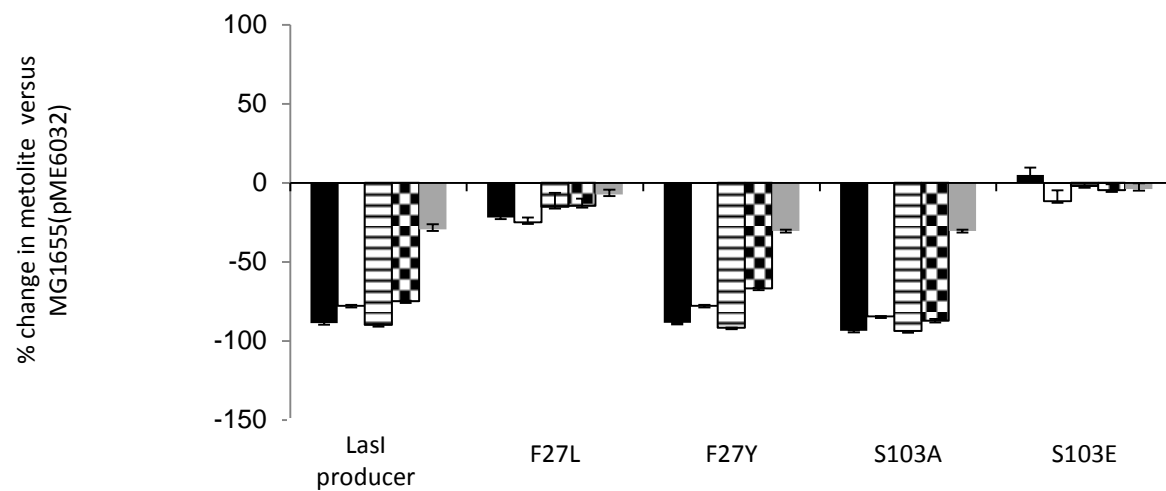

**(c)**

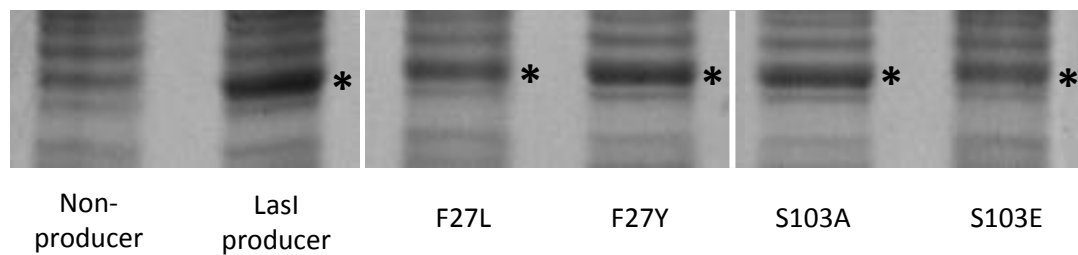

(d)

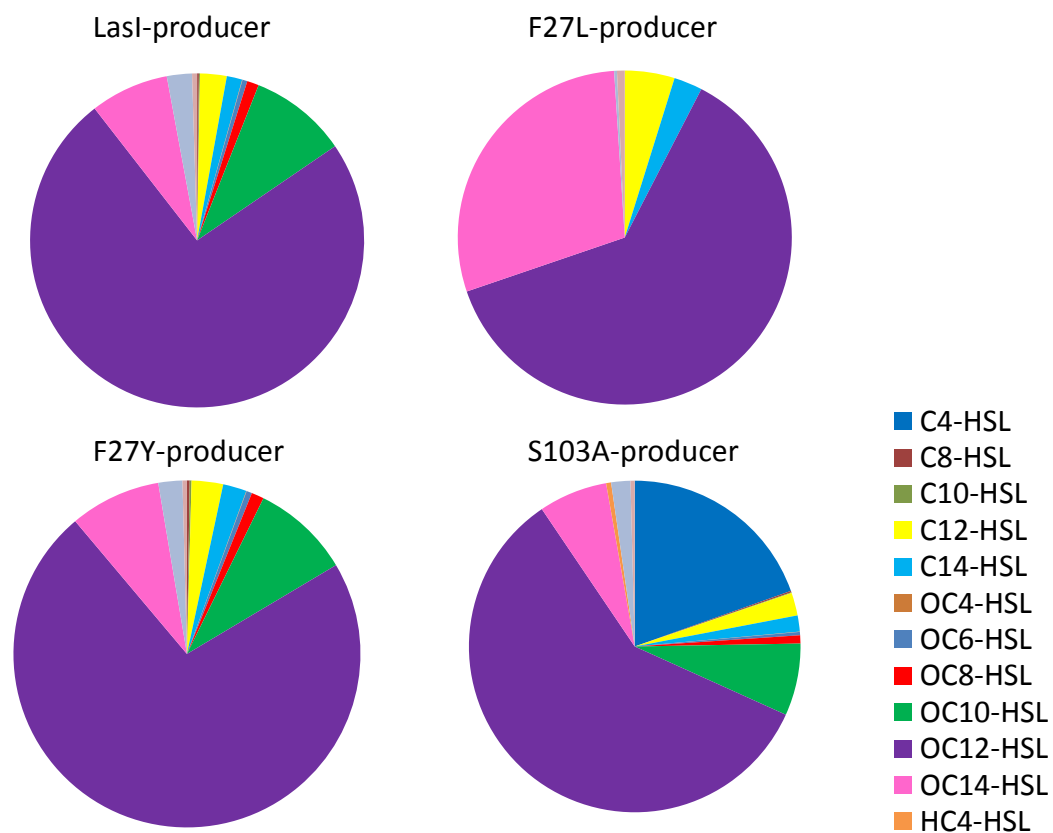

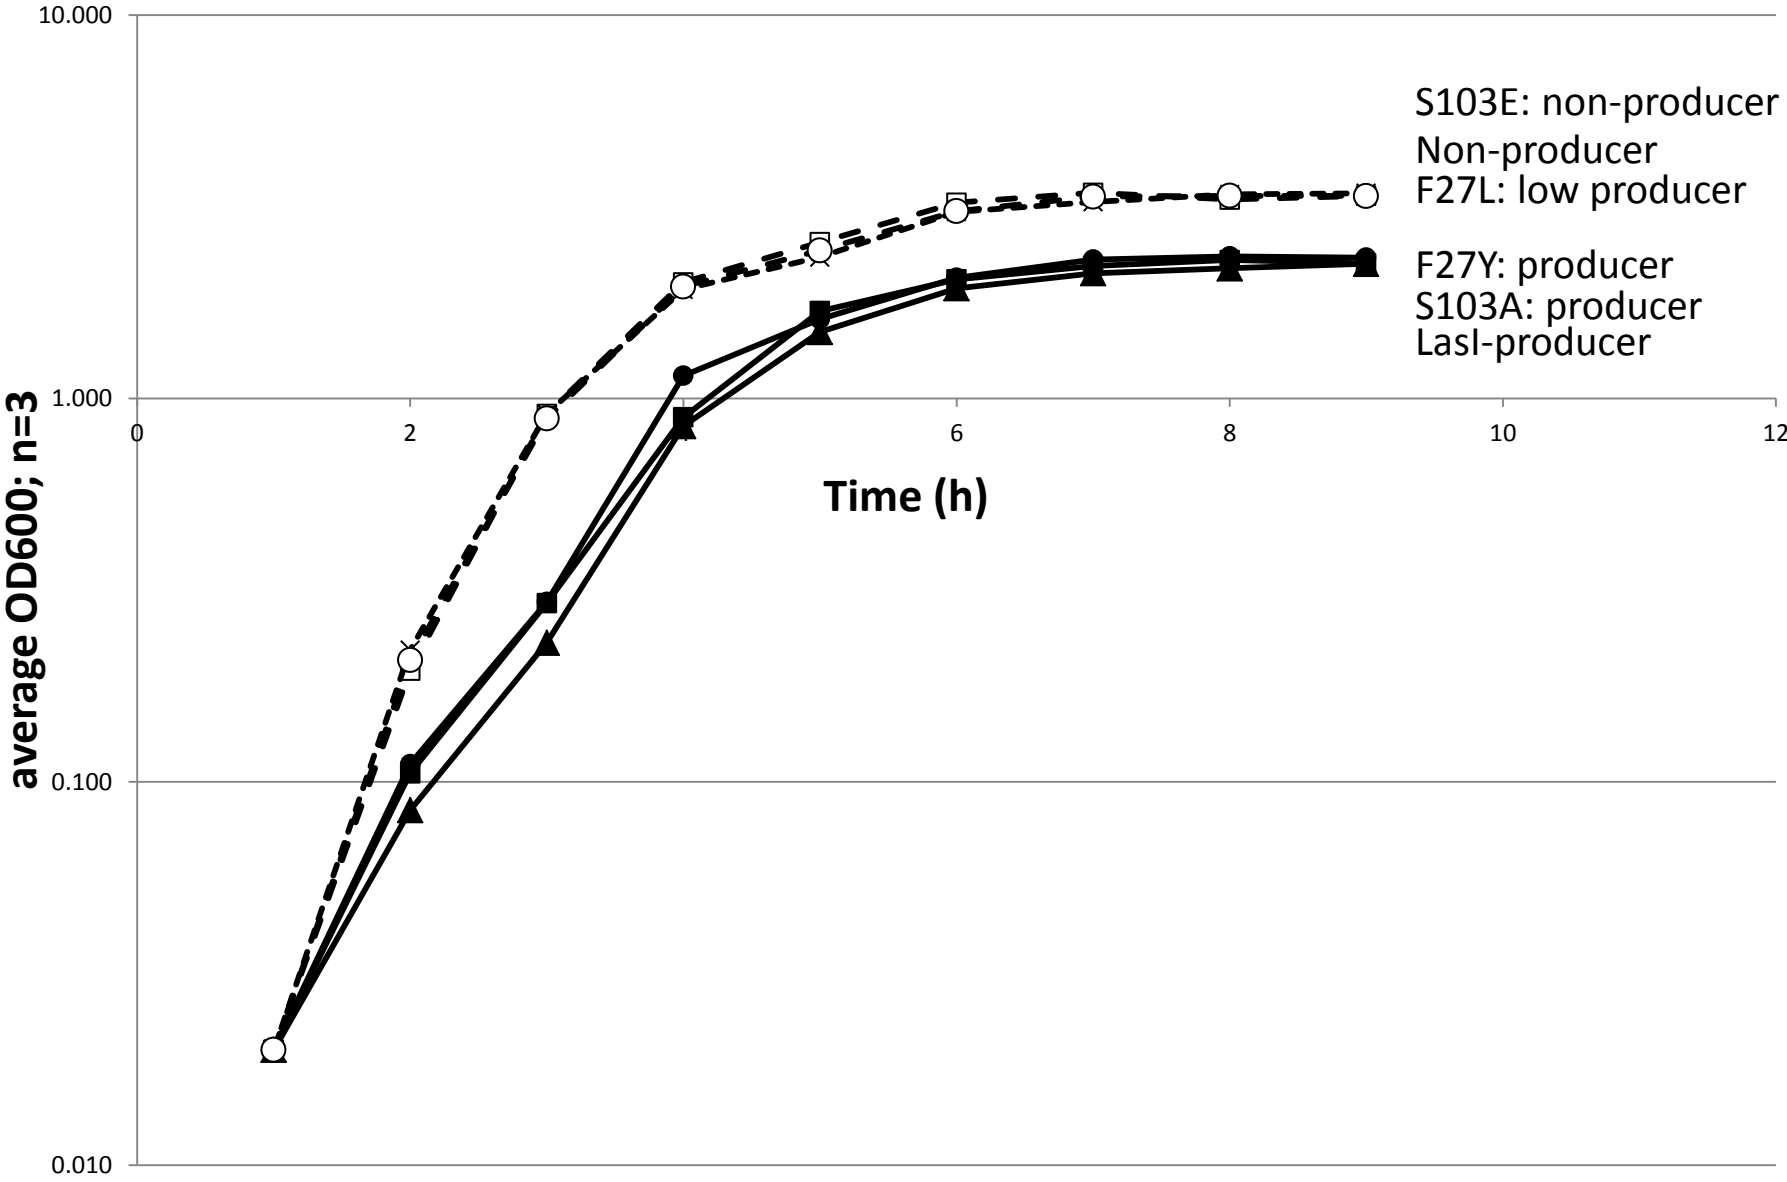

**(f) Minimal medium**

Supplementary  
FIG 4

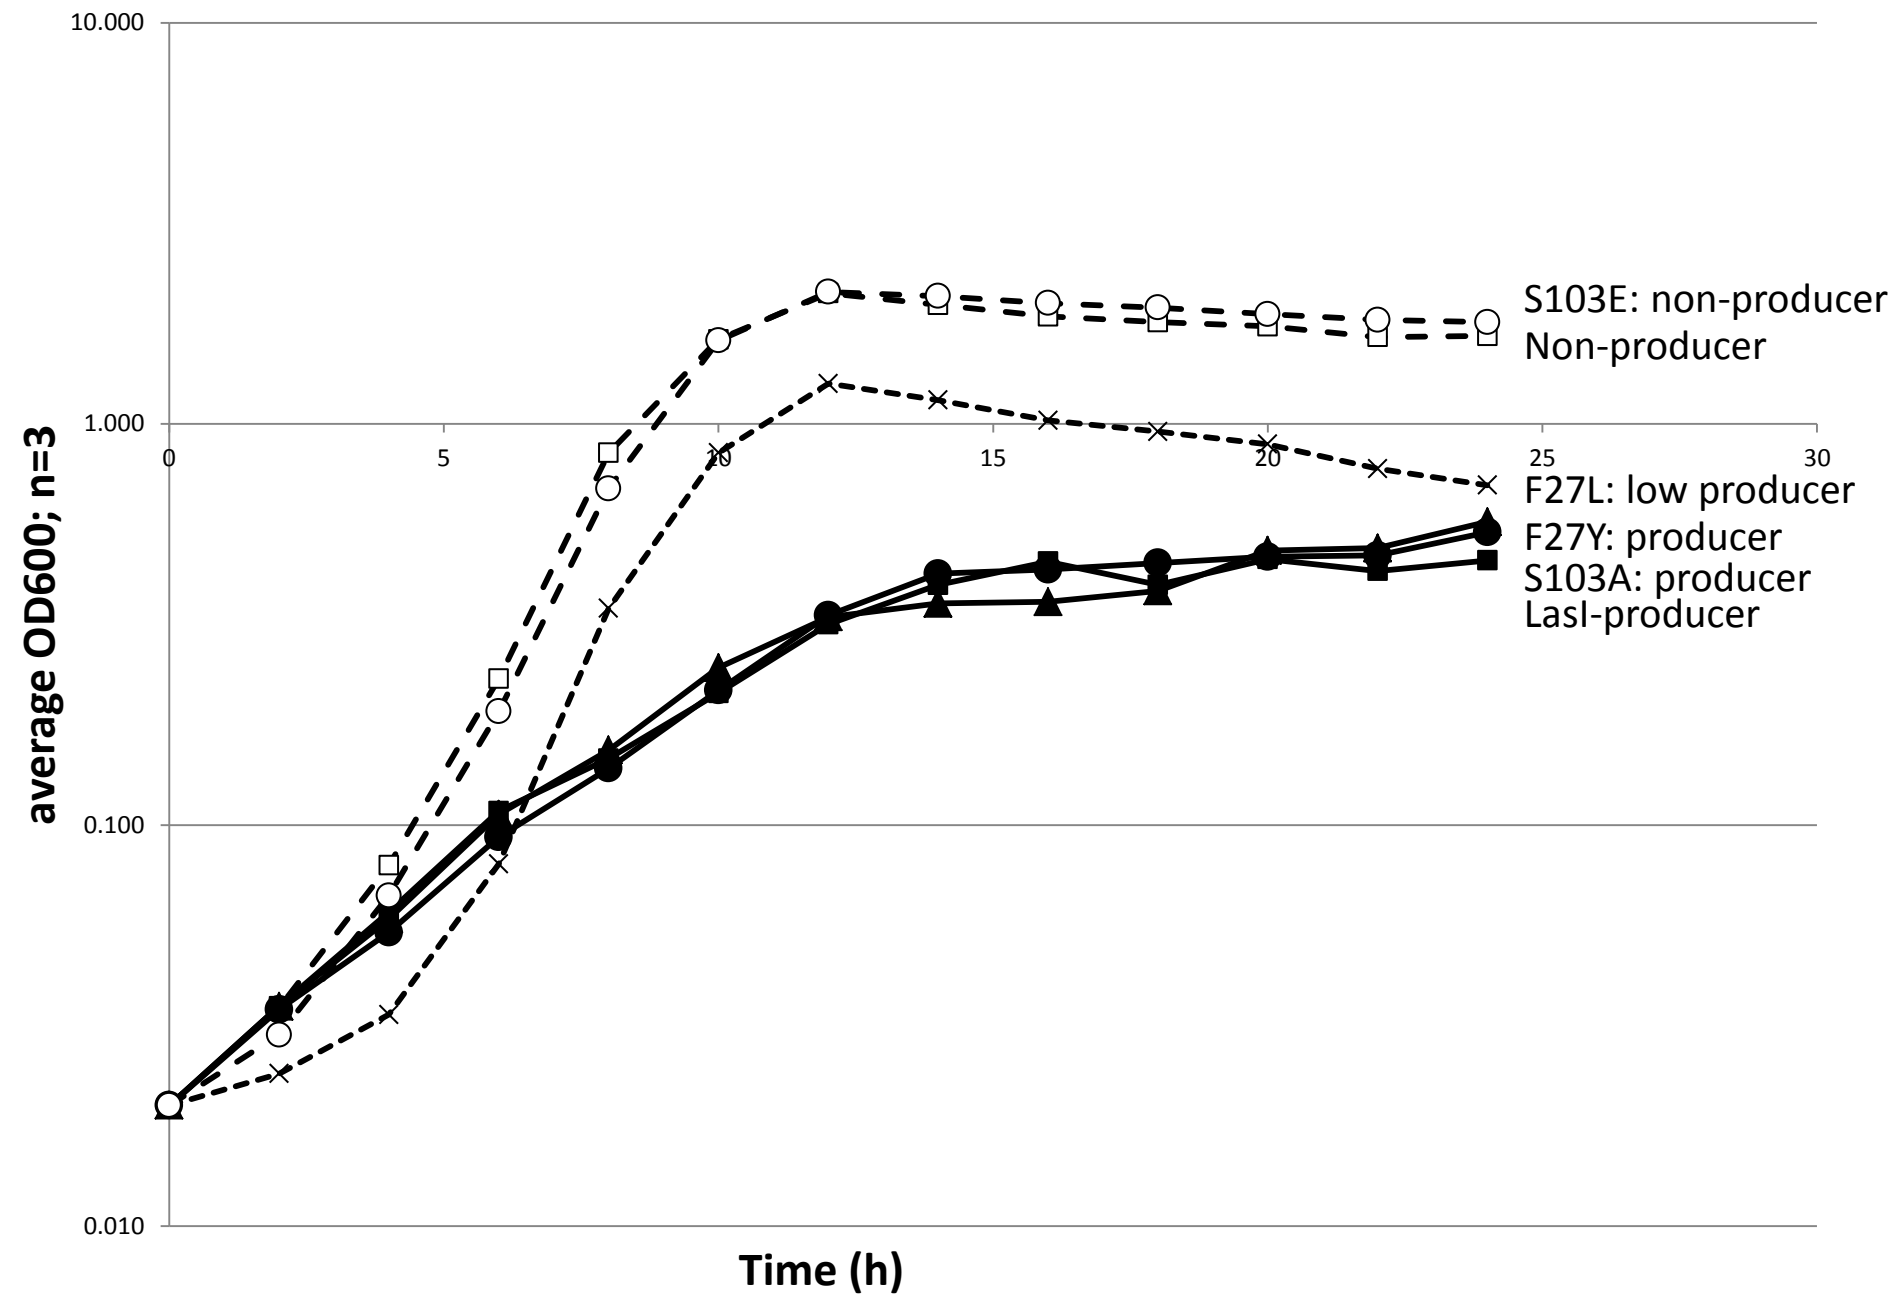



(a)

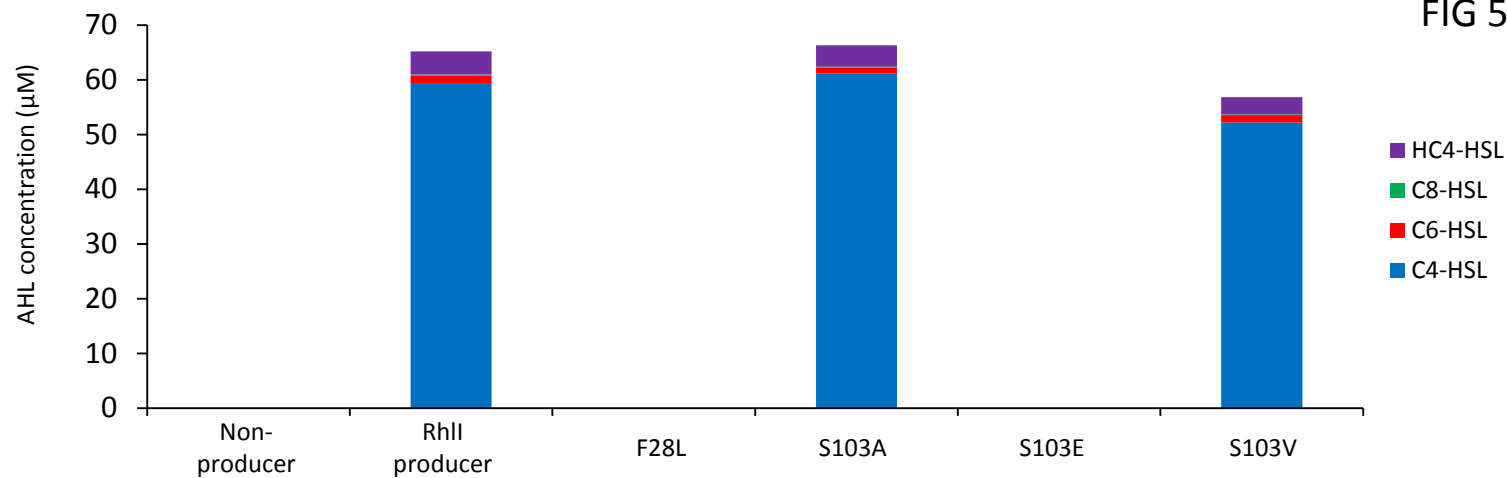

(b)

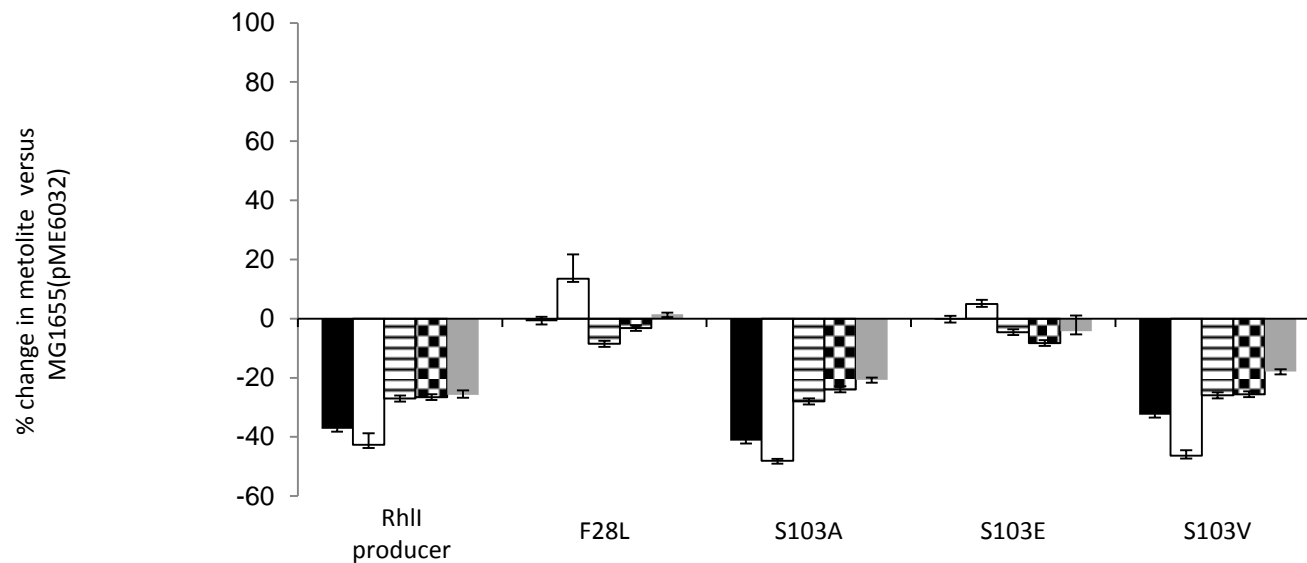

(c)

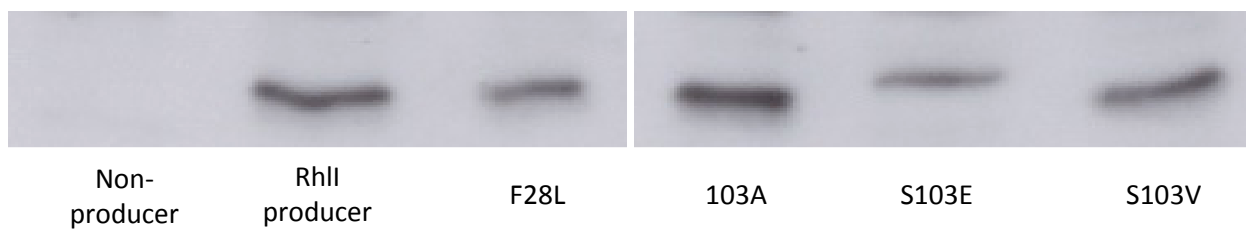

**(d)**

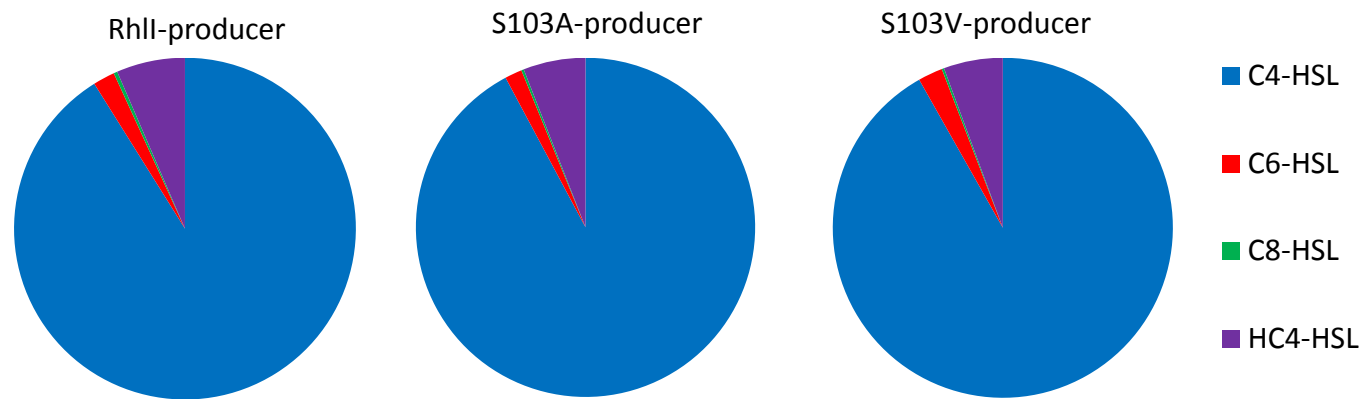

**(e) Rich medium**

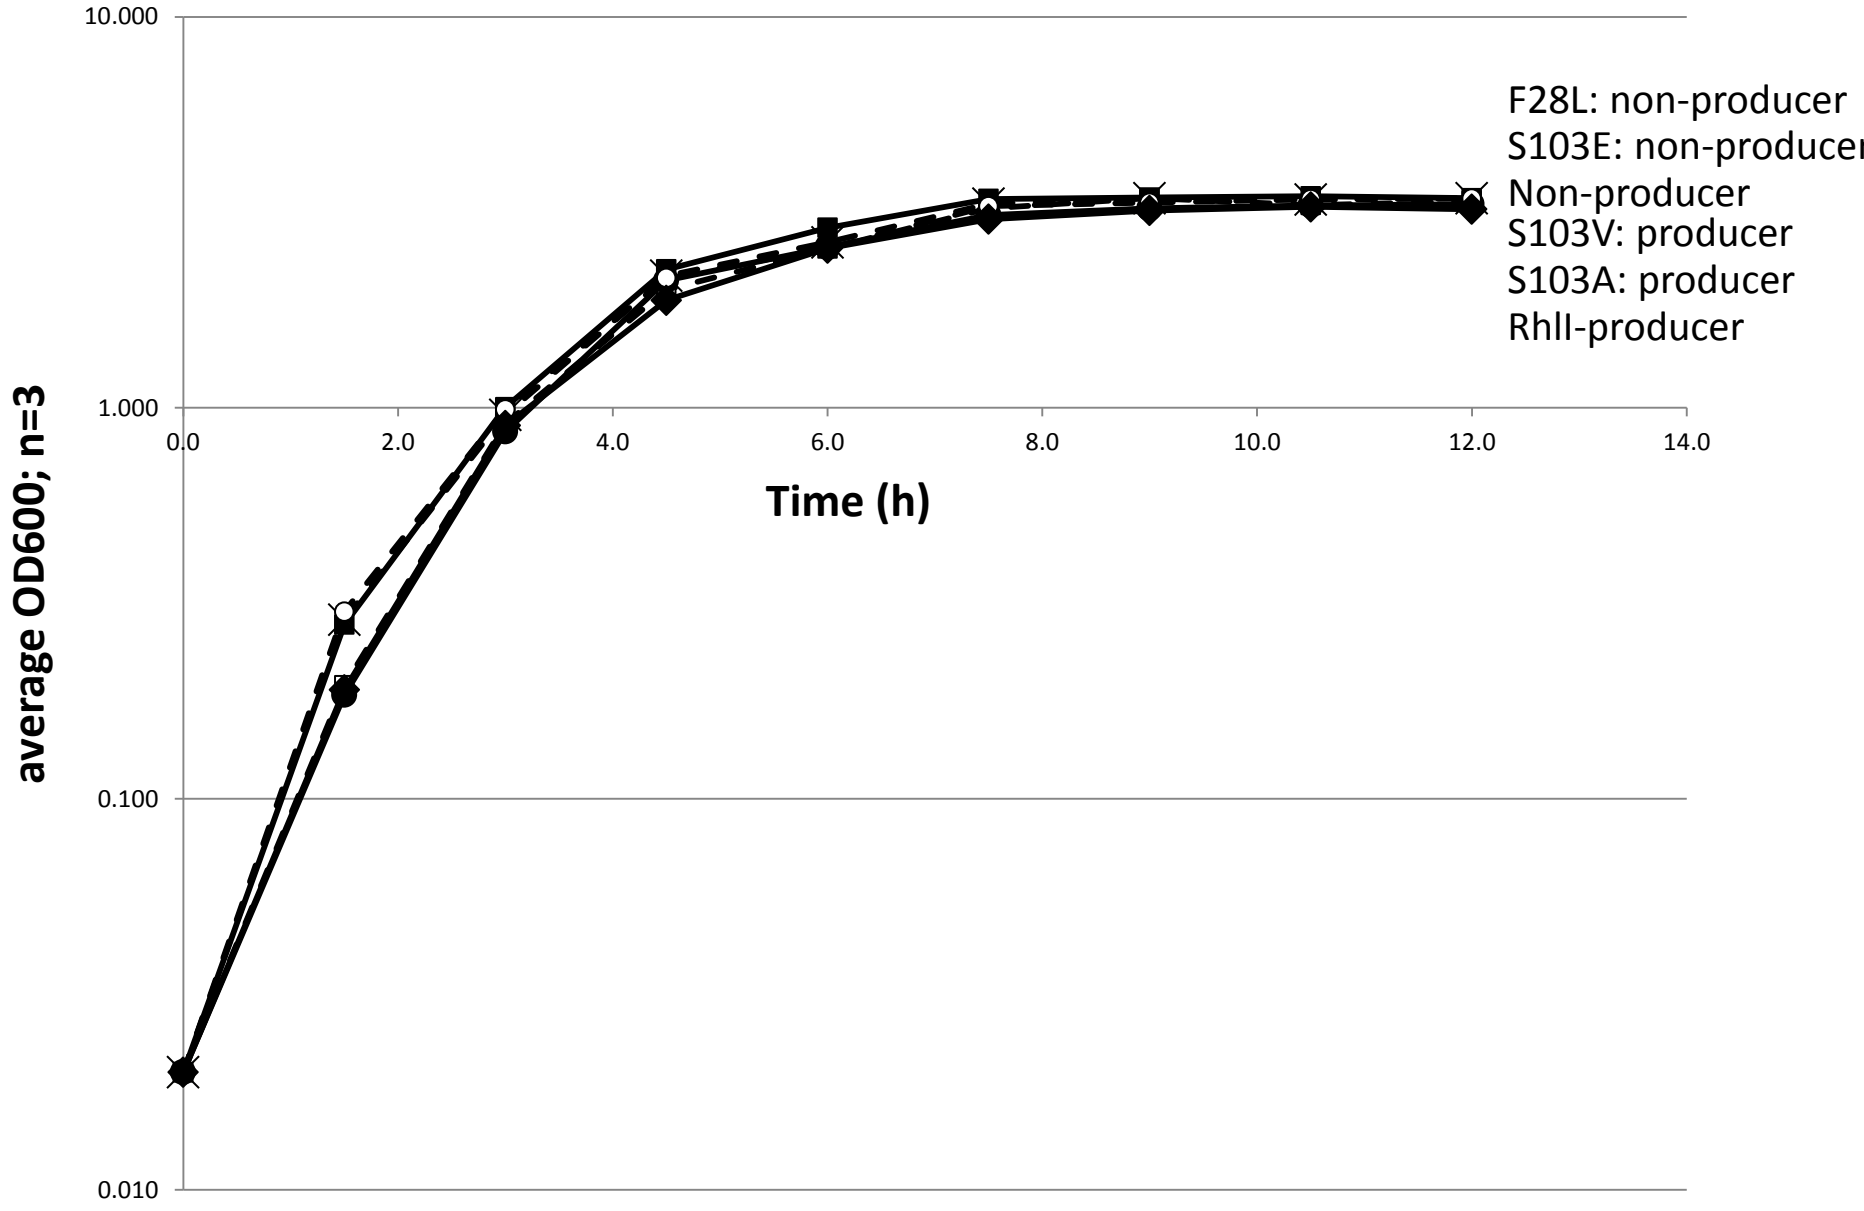

**(f) Minimal medium**

Supplementary  
FIG 5

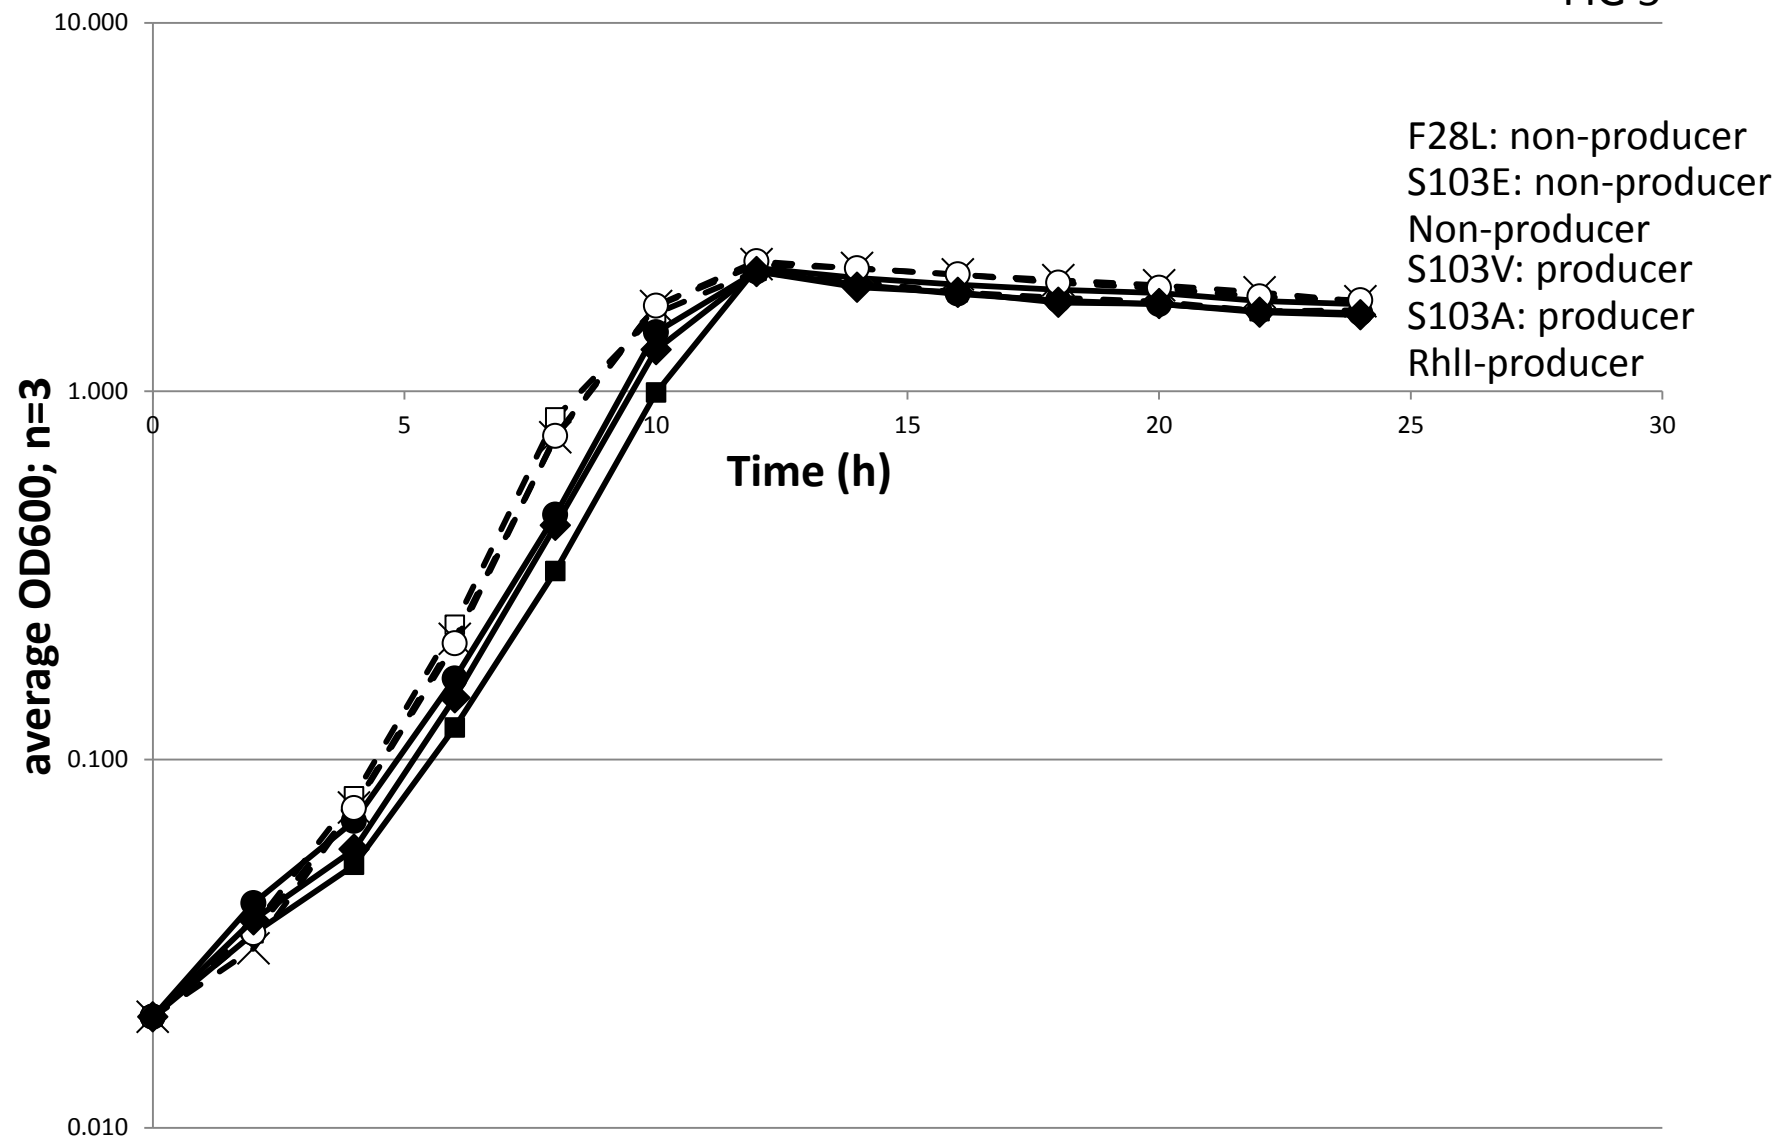

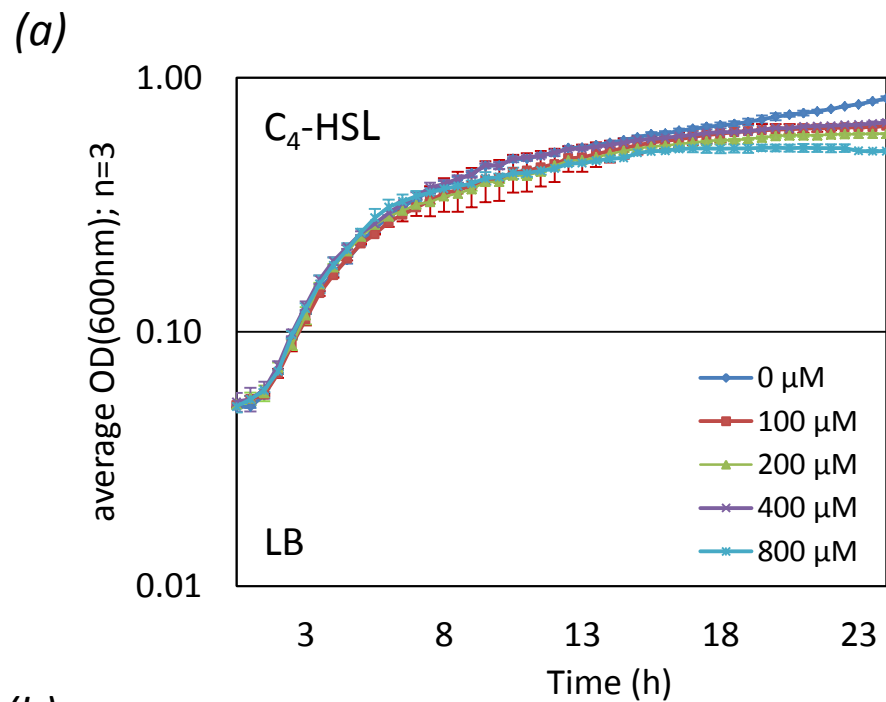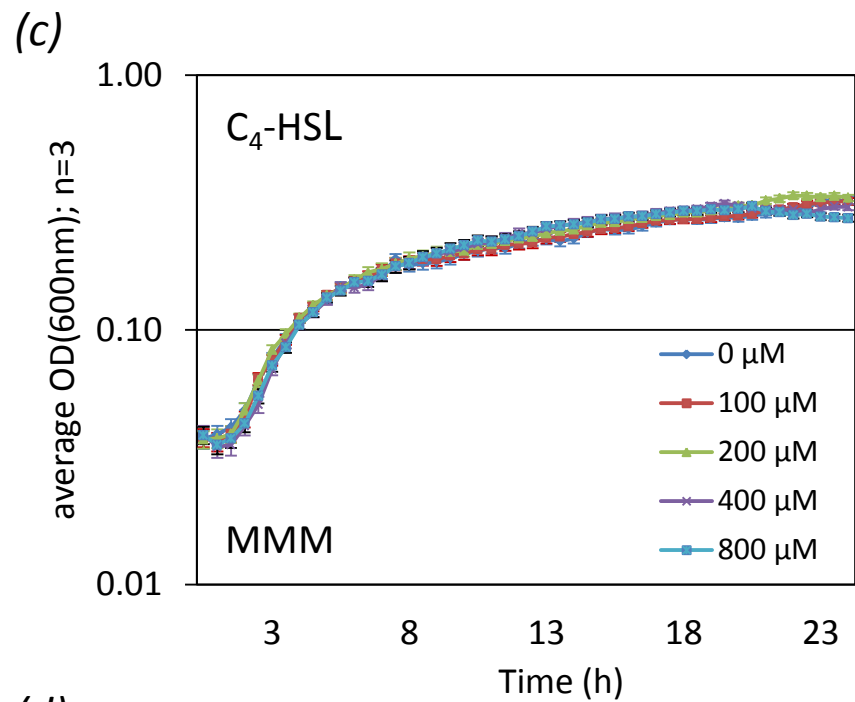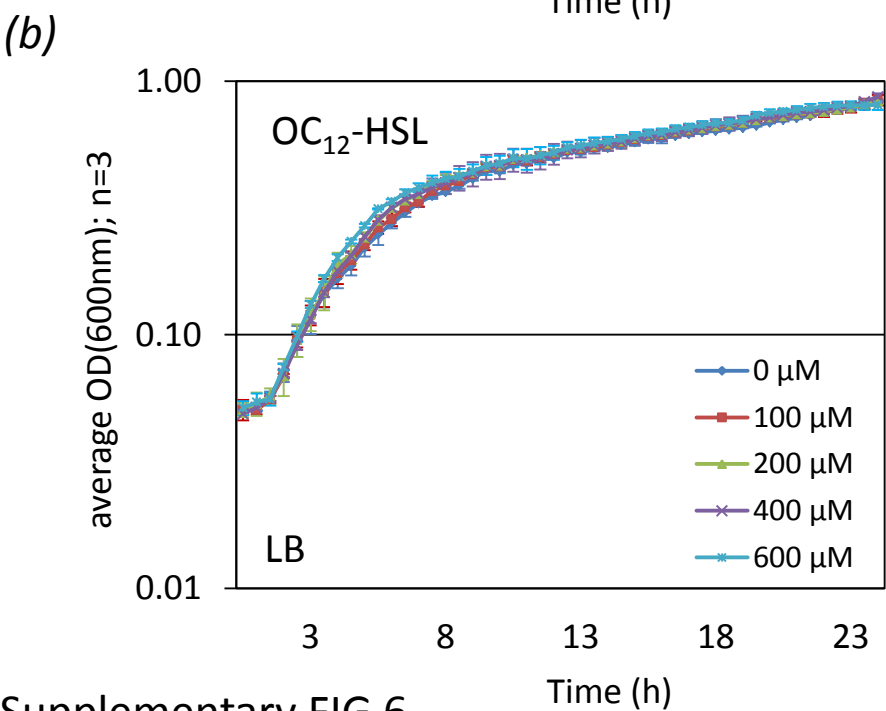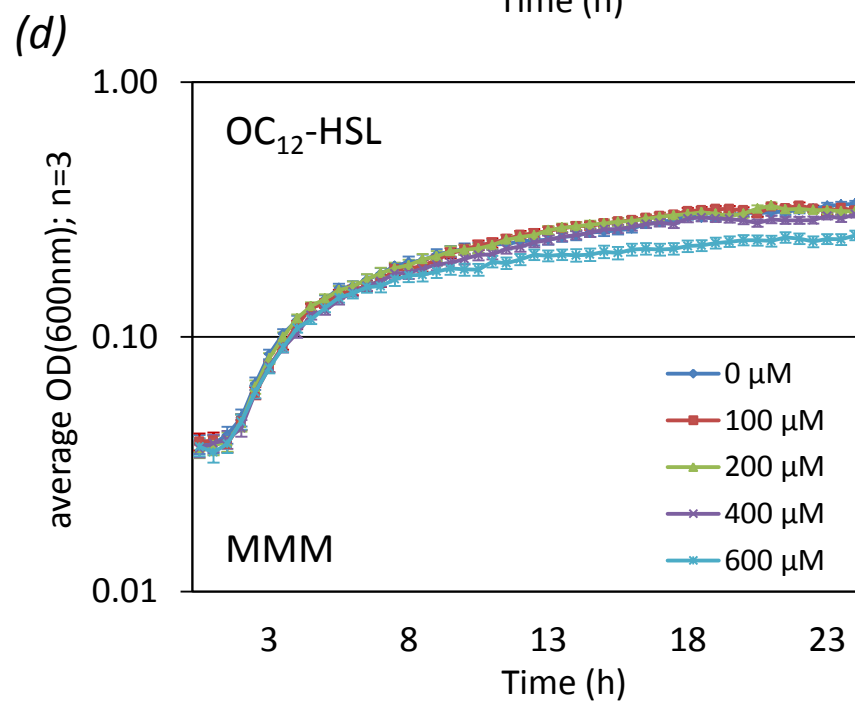

Supplementary FIG 6

# Supplementary Table 1. Strains, plasmids and primers used in this study.

| Strain, plasmid or oligonucleotide | Description and/or sequence (5'-3') <sup>a</sup>                                                                                       | Reference or source |
|------------------------------------|----------------------------------------------------------------------------------------------------------------------------------------|---------------------|
| <b>Strains</b>                     |                                                                                                                                        |                     |
| <i>Escherichia coli</i>            |                                                                                                                                        |                     |
| DH5α                               | F <sup>-</sup> <i>endA1 hsdR17 supE44 thi-1 recA1 gyrA96 relA1</i> Δ( <i>lacZYA-argF</i> )U169 <i>deoR</i> Δ(φ80d <i>lacZ</i> ΔM15)    | (1)                 |
| MG1655                             | F <sup>-</sup> λ <sup>-</sup>                                                                                                          | (2)                 |
| MG1655Δ <i>pfs</i>                 | <i>pfs</i> ::Km <sup>r</sup> derivative of MG1655                                                                                      | (3)                 |
| JM109                              | F9 <i>traD36 lacIq</i> D( <i>lacZ</i> )M15 <i>proA1B1/el42</i> D( <i>lac-proAB</i> ) <i>thi gyrA96 endA1 hsdR17 relA1 supE44 recA1</i> | (4)                 |
| <i>Vibrio harveyi</i>              |                                                                                                                                        |                     |
| BB170                              | Biosensor AI-1 <sup>-</sup> , biosensor AI-2 <sup>+</sup>                                                                              | (5)                 |
| <b>Plasmids</b>                    |                                                                                                                                        |                     |
| pGEM-T Easy                        | Cloning vector, Cb <sup>r</sup> , Amp <sup>r</sup> , <i>lacZ</i> , allowing selection via blue-white screening                         | Promega             |
| pME6032                            | Cloning vector for overexpression under the IPTG-inducible <i>tac</i> promoter, Tc <sup>r</sup>                                        | (6)                 |
| pME- <i>lasI</i>                   | pME6032 derivative carrying the <i>lasI</i> gene under <i>Ptac</i> control, Tc <sup>r</sup>                                            | This study          |
| pME- <i>lasI</i> R23W              | pME- <i>lasI</i> derivative carrying a substitution of Arg for Try at codon 23 of the <i>lasI</i> ORF                                  | This study          |
| pME- <i>lasI</i> F27L              | pME- <i>lasI</i> derivative carrying a substitution of Phe for Leu at codon 27 of the <i>lasI</i> ORF                                  | This study          |
| pME- <i>lasI</i> F27Y              | pME- <i>lasI</i> derivative carrying a substitution of Phe for Tyr at codon 27 of the <i>lasI</i> ORF                                  | This study          |
| pME- <i>lasI</i> W33G              | pME- <i>lasI</i> derivative carrying a substitution of Try for Gly at codon 33 of the <i>lasI</i> ORF                                  | This study          |
| pME- <i>lasI</i> S103A             | pME- <i>lasI</i> derivative carrying a substitution of Ser for Ala at codon 103 of the <i>lasI</i> ORF                                 | This study          |
| pME- <i>lasI</i> S103E             | pME- <i>lasI</i> derivative carrying a substitution of Ser for Glu at codon 103 of the <i>lasI</i> ORF                                 | This study          |
| pME- <i>lasI</i> S103V             | pME- <i>lasI</i> derivative carrying a substitution of Ser for Val at codon 103 of the <i>lasI</i> ORF                                 | This study          |
| pME- <i>rhII</i>                   | pME6032 derivative carrying the <i>rhII</i> gene under <i>Ptac</i> control, Tc <sup>r</sup>                                            | This study          |
| pME- <i>rhII</i> F28L              | pME- <i>rhII</i> derivative carrying a substitution of Phe for Leu at codon 28 of the <i>rhII</i> ORF                                  | This study          |
| pME- <i>rhII</i> F28Y              | pME- <i>rhII</i> derivative carrying a substitution of Phe for Tyr at codon 28 of the <i>rhII</i> ORF                                  | This study          |
| pME- <i>rhII</i> W34G              | pME- <i>rhII</i> derivative carrying a substitution of Try for Gly at codon 34 of the <i>rhII</i> ORF                                  | This study          |
| pME- <i>rhII</i> S103A             | pME- <i>rhII</i> derivative carrying a substitution of Ser for Ala at codon 103 of the <i>rhII</i> ORF                                 | This study          |
| pME- <i>rhII</i> S103E             | pME- <i>rhII</i> derivative carrying a substitution of Ser for Glu at codon 103 of the <i>rhII</i> ORF                                 | This study          |
| pME- <i>rhII</i> S103V             | pME- <i>rhII</i> derivative carrying a substitution of Ser for Val at codon 103 of the <i>rhII</i> ORF                                 | This study          |
| pSB1142                            | <i>lux</i> -based acyl-HSL bioreporter, Tc <sup>r</sup>                                                                                | (7)                 |
| pSB536                             | <i>lux</i> -based acyl-HSL bioreporter, Amp <sup>r</sup>                                                                               | (7)                 |
| <b>Primers</b>                     |                                                                                                                                        |                     |
| <i>lasI</i> -F                     | TATCAATTGATGATCGTACAAATTGGTCGG, with an underlined <i>MfeI</i>                                                                         |                     |

restriction site directly upstream of the start codon (bold) of *lasI*

|                |                                                                                                                                                      |
|----------------|------------------------------------------------------------------------------------------------------------------------------------------------------|
| lasI R23W-F    | [Phos]TTG TGGGCTCAAGTGTC, with an italicized codon for substitution of Arg for Trp                                                                   |
| lasI F28L-F    | [Phos]TGCTGAAGGAGCGCAAAG, with an italicized codon for substitution of Phe for Leu                                                                   |
| lasI F28Y-F    | [Phos]TG TACAAGGAGCGCAAAG, with an italicized codon for substitution of Phe for Tyr                                                                  |
| lasI W33G-F    | [Phos]AGGCGGCGACGTTAGTGT, with an italicized codon for substitution of Tyr for Gly                                                                   |
| lasI S103A-F   | [Phos]TCGCCCCGTTTCGCCATCA, with an italicized codon for substitution of Ser for Ala                                                                  |
| lasI S103E-F   | [Phos]TGGAACGAGCGTTTC, with an italicized codon for substitution of Ser for Glu                                                                      |
| lasI S103V-F   | [Phos]TCGTGCGTTTCGCCATCA, with an italicized codon for substitution of Ser for Val                                                                   |
| lasI-R         | ATAAGGCCT <b>TC</b> ATGAAACCGCCAGTCGCT, with an underlined <i>StuI</i> restriction site directly downstream of the stop codon (bold) of <i>lasI</i>  |
| lasI R23W-R    | [Phos]CTTGTGCATCTCGCCCAG, for substitution of Arg for Trp                                                                                            |
| lasI F28L-R    | [Phos]CTTGAGCACGCAACTTGT, for substitution of Phe for Leu                                                                                            |
| lasI F28Y-R    | [Phos]CTTGAGCACGCAACTTGT, for substitution of Phe for Tyr                                                                                            |
| lasI W33G-R    | [Phos]TTGCGCTCCTTGAACACT, for substitution of Tyr for Gly                                                                                            |
| lasI S103A/V-R | [Phos]GTTCCCAGATGTGCGGCG, for substitution of serine for Ala or Val                                                                                  |
| lasI S103E-R   | [Phos]GATGTGCGGCGAGCAAGG, for substitution of Ser for Glu                                                                                            |
| Ptac           | CGGCTCGTATAATGTGTGGA, primer to sequence multiple cloning site in pME6032                                                                            |
| P6032          | CCCTCACTGATCCGCTAGTC, primer to sequence multiple cloning site in pME6032                                                                            |
| rhII-F         | TATCAATTG <b>ATG</b> ATCGAATTGCTCTCTGAAT, with an underlined <i>MfeI</i> restriction site directly upstream of the start codon (bold) of <i>rhII</i> |
| rhII F28L-F    | [Phos]TCCTGATCGAGAAGCTGG, with an italicized codon for substitution of Phe for Leu                                                                   |
| rhII F28Y-F    | [Phos]TC TACATCGAGAAGCTGG, with an italicized codon for substitution of Phe for Tyr                                                                  |
| rhII W34G-F    | [Phos]TGGGCGGCGACGTGGTCT, with an italicized codon for substitution of Tyr for Gly                                                                   |
| rhII S103A-F   | [Phos]TTGCCCGCTACGCCGCCA, with an italicized codon for substitution of Ser for Ala                                                                   |
| rhII S103E-F   | [Phos]TGGGAGCTTGAGCGCTAC, with an italicized codon for substitution of Ser for Glu                                                                   |
| rhII S103V-F   | [Phos]TTGTGCGCTACGCCGCCA, with an italicized codon for substitution of Ser for Val                                                                   |
| rhII-R         | ATAAGGCCT <b>TC</b> ACACCGCCATCGACAGC, with an underlined <i>StuI</i> restriction site directly downstream of the stop codon (bold) of <i>rhII</i>   |
| rhII F28L-R    | [Phos]CCTGATGCCGGTAGCGTC, for substitution of Phe for Leu                                                                                            |
| rhII F28Y-R    | [Phos]CCTGATGCCGGTAGCGTC, for substitution of Phe for Tyr                                                                                            |
| rhII W34G-R    | [Phos]GCTTCTCGATGAAGACCT, for substitution of Tyr for Gly                                                                                            |

|               |                                                                  |
|---------------|------------------------------------------------------------------|
| rhII S103A/VR | [Phos]GCTCCCAGACCGACGGAT, for substitution of Ser for Ala or Val |
| rhII S103E-R  | [Phos]GACCGACGGATCGCTCGG, for substitution of Ser for Glu        |

---

## References for Table

1. **Sambrook, J., and D. W. Russell.** 2001. Molecular Cloning: A Laboratory Manual. .
2. **Jensen, K. F.** 1993. The *Escherichia coli* K-12 "wild types" W3110 and MG1655 have an *rph* frameshift mutation that leads to pyrimidine starvation due to low *pyrE* expression levels. *Journal of Bacteriology*. **175**:3401-3407.
3. **Tavender, T., N. Halliday, K. Hardie, and K. Winzer.** 2008. LuxS-independent formation of AI-2 from ribulose-5-phosphate. *BMC Microbiology*. **8**:98.
4. **Yanisch-Perron, C., J. Vieira, and J. Messing.** 1985. Improved M13 phage cloning vectors and host strains: nucleotide sequences of the M13mp18 and pUC19 vectors. *Gene*. **33**:103-119.
5. **Surette, M. G., M. B. Miller, and B. L. Bassler.** 1999. Quorum sensing in *Escherichia coli*, *Salmonella typhimurium*, and *Vibrio harveyi*: A new family of genes responsible for autoinducer production. *Proceedings of the National Academy of Sciences*. **96**:1639-1644. doi: 10.1073/pnas.96.4.1639.
6. **Heeb, S., C. Blumer, and D. Haas.** 2002. Regulatory RNA as Mediator in GacA/RsmA-Dependent Global Control of Exoproduct Formation in *Pseudomonas fluorescens* CHA0. *Journal of Bacteriology*. **184**:1046-1056. doi: 10.1128/jb.184.4.1046-1056.2002.
7. **Winson, M., S. Swift, P. Hill, C. Sims, G. Griesmayr, B. Bycroft, P. Williams, and G. Stewart.** 1998. Engineering the *luxCDABE* genes from *Photobacterium luminescens* to provide a bioluminescent reporter for constitutive and promoter probe plasmids and mini-Tn5 constructs. *FEMS Microbiol. Lett.* **163**:193-202.



**Supplementary Table 2. Substitutions chosen for mutagenesis of AHL synthases.** Residues chosen aligned with those published in (1), and map to equivalent positions in *lasI*. Other substitutions chosen were predicted to insert more structurally conservative changes.

| AA position | AA Encoded | WT DNA sequence | Mutant AA | Mutant DNA sequence |
|-------------|------------|-----------------|-----------|---------------------|
| <i>lasI</i> |            |                 |           |                     |
| 23          | R          | CGT             | W         | TGG                 |
| 27          | F          | TTC             | L         | CTG                 |
|             |            |                 | Y         | TAC                 |
| 33          | W          | TGG             | G         | GGC                 |
| 103         | S          | AGC             | A         | GCC                 |
|             |            |                 | E         | GAA                 |
|             |            |                 | V         | TGC                 |
| <i>rhII</i> |            |                 |           |                     |
| 28          | F          | TTC             | L         | CTG                 |
|             |            |                 | Y         | TAC                 |
| 34          | W          | TGG             | G         | GGC                 |
| 103         | S          | TTC             | A         | GCC                 |
|             |            |                 | E         | GAG                 |
|             |            |                 | V         | GTG                 |

## References.

**1. Parsek, M. R., A. L. Schaefer, and E. P. Greenberg.** 1997. Analysis of random and site-directed mutations in *rhII*, a *Pseudomonas aeruginosa* gene encoding an acylhomoserine lactone synthase. Mol. Microbiol. **26**:301-310.

**Supplementary Table 3. MTA levels in strains bearing QSSM synthases.**

Figures for metabolites attained in one representative independent experiment.

|               | <i>lasI</i>   | <i>rhII</i>  |
|---------------|---------------|--------------|
| Vector alone  | (1.03 ± 0.02) |              |
| WT, unmutated | 26.54 ± 0.43  | 18.81 ± 0.72 |
| gene          |               |              |
| R23W          | 1.09 ± 0.12   | -            |
| F27L; F28L    | 6.10 ± 0.32   | 1.89 ± 0.09  |
| F27Y; F28Y    | 30.38 ± 0.95  | 1.09 ± 0.12  |
| W33G; W34G    | 2.04 ± 0.13   | 1.73 ± 0.03  |
| S103A         | 43.28 ± 1.06  | 20.83 ± 0.37 |
| S103E         | 2.17 ± 0.55   | 1.98 ± 0.19  |
| S103V         | 1.29 ± 0.09   | 21.06 ± 1.84 |

<sup>†</sup>Concentrations (in relative units) of AMC metabolites were determined by analysing cell content using LC-MS analysis, as described in Materials and Methods. The mean OD<sub>600</sub> values of triplicate culture samples standard deviations from the means are shown.

**Supplementary Table 4. Intracellular concentrations of AMC metabolites decrease in *E. coli* producing active QSSM synthases.** Figures for metabolites attained in one representative independent experiment.

| Met. | Cell density (OD <sub>600</sub> ) | MG1655 [pME6032] -IPTG | MG1655 [pME6032] +IPTG | MG1655 [pME- <i>lasI</i> ] -IPTG | MG1655 [pME- <i>lasI</i> ] +IPTG | MG1655 [pME- <i>rhlI</i> ] -IPTG | MG1655 [pME- <i>rhlI</i> ] +IPTG |
|------|-----------------------------------|------------------------|------------------------|----------------------------------|----------------------------------|----------------------------------|----------------------------------|
| SAM  |                                   | 39.46 ± 0.72           | 45.67 ± 1.11           | 43.85 ± 2.25                     | 1.39 ± 0.02                      | 39.77 ± 0.86                     | 23.40 ± 0.29                     |
| SAH  |                                   | 0.109 ± 0.001          | 0.112 ± 0.010          | 0.102 ± 0.004                    | 0.029 ± 0.004                    | 0.086 ± 0.002                    | 0.058 ± 0.006                    |
| SRH  |                                   | 0.590 ± 0.025          | 0.561 ± 0.016          | 0.564 ± 0.007                    | 0.060 ± 0.004                    | 0.599 ± 0.051                    | 0.444 ± 0.064                    |
| HCY  |                                   | 8.204 ± 0.819          | 8.250 ± 0.486          | 8.614 ± 0.291                    | 2.109 ± 0.268                    | 8.834 ± 1.360                    | 6.360 ± 0.216                    |
| MET  |                                   | 188.539 ± 5.668        | 182.668 ± 11.185       | 180.537 ± 3.735                  | 127.390 ± 4.525                  | 185.038 ± 12.581                 | 146.284 ± 4.002                  |

<sup>†</sup>Concentrations (in relative units) of AMC metabolites were determined by analysing cell content using LC-MS analysis, as described in Materials and Methods. The mean OD<sub>600</sub> values of triplicate culture samples standard deviations from the means are shown.
